1 **Running title: *Castanea crenata* AOS improves defense to oomycetes**

2

3 **Corresponding authors:**

4 Susana Serrazina & Rui Malhó

5 BioISI – Biosystems & Integrative Sciences Institute, Faculdade de Ciências, Universidade  
6 de Lisboa, 1749-016 Lisboa, Portugal

7 Tel: +351217500069; Fax: +351217500048; E-mail: [smserrazina@fc.ul.pt](mailto:smserrazina@fc.ul.pt) / [r.malho@fc.ul.pt](mailto:r.malho@fc.ul.pt)

8

9

10

11

12 **Title: Expression of *Castanea crenata* Allene Oxide Synthase in *Arabidopsis* Improves**  
13 **the Defense to *Phytophthora cinnamomi***

14

15 Susana Serrazina<sup>1\*</sup>, Helena Machado<sup>2</sup>, Rita Costa<sup>2,3</sup>, Paula Duque<sup>4</sup> and Rui Malhó<sup>1\*</sup>

16

17 BioISI – Biosystems & Integrative Sciences Institute, Faculdade de Ciências, Universidade  
18 de Lisboa, 1749-016 Lisboa, Portugal

19

20 **One-sentence summary:**

21 Heterologous expression of the *Castanea crenata* allene oxide synthase gene in *Arabidopsis*  
22 *thaliana* improves the defense response to the pathogen *Phytophthora cinnamomi*.

23

24 <sup>1</sup> This work was supported by Fundação para a Ciência e a Tecnologia  
25 (FCT/MCTES/PIDDAC, Portugal) through postdoctoral fellowship SFRH/BPD/108653/2015  
26 and a contract-program defined by DL nr. 57/2016 and Law nr. 57/2017 awarded to S.S., as  
27 well as through research funds awarded to R.M. (UIDB/04046/2020 and UIDP/04046/2020)  
28 and P.D. (UIDB/04551/2020).

29 <sup>2</sup> INIAV—Instituto Nacional de Investigação Agrária e Veterinária, 2780-157 Oeiras,  
30 Portugal

31 <sup>3</sup> Centro de Estudos Florestais, Instituto Superior de Agronomia, Universidade de Lisboa—  
32 Tapada da Ajuda, 1349-017 Lisboa, Portugal

33 <sup>4</sup> Instituto Gulbenkian de Ciência (IGC), 2780-156 Oeiras, Portugal

34 \*Address correspondence to [smserrazina@fc.ul.pt](mailto:smserrazina@fc.ul.pt)

35 The author responsible for distribution of materials integral to the findings presented in this  
36 article in accordance with the Journal policy described in the Instructions for Authors  
37 (<http://www.plantphysiol.org>) is: Susana Serrazina ([smserrazina@fc.ul.pt](mailto:smserrazina@fc.ul.pt))

38

39 Keywords: Allene oxide synthase, *Castanea crenata*, gene functional analysis, *Phytophthora*  
40 *cinnamomi*

41

42 **ABSTRACT**

43 Allene oxide synthase (AOS) is a key enzyme of the jasmonic acid (JA) signaling pathway.  
44 The *AOS* gene was previously found to be upregulated in an Asian chestnut species resistant  
45 to infection by the oomycete *Phytophthora cinnamomi* (*Castanea crenata*), while lower  
46 expression values were detected in the susceptible European chestnut (*Castanea sativa*).  
47 Here, we report a genetic and functional characterization of the *C. crenata* AOS (CcAOS)  
48 upon its heterologous gene expression in a susceptible ecotype of *Arabidopsis thaliana*,  
49 which contains a single *AOS* gene. It was found that *Arabidopsis* plants expressing CcAOS  
50 delay pathogen progression and exhibit more vigorous growth in its presence. They also show  
51 upregulation of jasmonic acid and salicylic acid-related genes. As in its native species,  
52 heterologous CcAOS localized to plastids, as revealed by confocal imaging of the CcAOS-  
53 eGFP fusion protein in transgenic *Arabidopsis* roots. This observation was confirmed upon  
54 transient expression in *Nicotiana benthamiana* leaf epidermal cells. To further confirm a  
55 specific role of CcAOS in the defense mechanism against the pathogen, we performed  
56 crosses between transgenic CcAOS plants and an infertile *Arabidopsis AOS* knockout mutant  
57 line. It was found that plants expressing *CcAOS* exhibit normal growth, remain infertile but  
58 are significantly more tolerant to the pathogen than wild type plants.

59 Together, our results indicate that CcAOS is an important player in plant defense responses  
60 against oomycete infection and that its expression in susceptible varieties may be a valuable  
61 tool to mitigate biotic stress responses.

62

63

## 64 INTRODUCTION

65 The European chestnut (*Castanea sativa*) suffers significant losses in orchard  
66 production due to its most dangerous pathogen, *Phytophthora cinnamomi*. *P. cinnamomi* is a  
67 soil-borne hemibiotrophic oomycete that infects roots in the presence of water through motile  
68 zoospores, an infection that can also occur artificially using mycelium inocula (Moralejo et  
69 al., 2009; Redondo et al., 2015). From roots, the pathogen progresses through the vascular  
70 system, hampering water and nutrient uptake, causing host disease and eventually death  
71 (Maurel et al., 2004).

72 Among chestnuts, the Asian species exhibit higher resistance to *P. cinnamomi*,  
73 particularly the Japanese chestnut, *C. crenata*. We previously sequenced the root  
74 transcriptomes of *C. crenata* and *C. sativa* upon *P. cinnamomi* inoculation and found  
75 differentially expressed genes in *C. crenata* that are candidate defense genes against this  
76 oomycete (Serrazina et al., 2015). Among these, allene oxide synthase (AOS) presented a  
77 striking expression pattern, being upregulated five-fold in the resistant species while  
78 downregulated three-fold in *C. sativa* (Serrazina et al., 2015).

79 The defense response against soil-borne pathogens in roots begins with  
80 microorganism recognition through microbe-associated molecular patterns (MAMP) and/or  
81 plant damage-associated molecular patterns (DAMP); both can initiate a plant immune  
82 response (reviewed by De Coninck et al., 2014). Membrane-bound pattern recognition  
83 receptors of the plant recognize M/DAMPs leading to MAMP-triggered immunity (MTI) and,  
84 subsequently, cell wall fortification, production of reactive oxygen species (ROS),  
85 pathogenesis-related proteins (PR proteins) and secondary metabolites such as phytoalexins  
86 (De Coninck et al., 2014). Pathogens that can suppress MTI produce effectors that mask  
87 MAMPs, inhibit proteases and thus hamper host responses. Oomycete pathogens can also  
88 develop haustoria that are able to release effectors into the plant cell. On the other hand,  
89 plants co-evolving with pathogens can develop effector recognition (via R genes) through  
90 proteins with a nucleotide-binding (NB) and a leucine-rich repeat (LRR) domain, leading to  
91 effector-triggered immunity. This type of immunity is stronger than MTI and can give rise to  
92 the hypersensitive response, characterized by programmed cell death. After MTI, root  
93 defense responses are regulated depending on the type of threat, with the phytohormones  
94 salicylic acid (SA) and jasmonic acid (JA), among others, playing crucial roles in the primary  
95 signaling (Chen et al, 2015).

96 JA and derived metabolites function as signals in the response to several stimuli,  
97 including biotic or abiotic stress and wounding, as well as in developmental processes, such  
98 as pollen development and anther dehiscence, root growth or fruit ripening (Devoto and  
99 Turner, 2005). More recently, Balfagón et al. (2019) described an important role of JA in  
100 plant acclimation to intense light and heat stress.

101 AOS, or Cytochrome P450 74A, is predominantly localized in the plastid membrane  
102 (Froehlich et al., 2001) and takes part in the first steps of the JA signaling pathway;  
103 lipoxygenase produces 13-hydroperoxy-linoleic acid from membrane lipids, which  
104 spontaneously degrades into a keto-hydroxy fatty acid derivative that is transformed into  
105 allene oxide by AOS (Chapple, 1998). Allene oxide is rapidly cyclized by allene oxide  
106 cyclase to a more stable product, cis-(+)-12-oxo-phytodienoic acid (OPDA) (Laudert and  
107 Weiler, 1998). Our previous work pointed to the importance of the JA pathway for the  
108 chestnut defense response to *P. cinnamomi*, revealing the differential expression of both JA  
109 pathway and JA-induced genes upon *C. crenata* and *C. sativa* infection (Serrazina et al.,  
110 2015). Camisón et al. (2019) further reported that jasmonoyl-isoleucine (JA-Ile) levels  
111 increase in resistant chestnut roots following infection, while JA-Ile is practically  
112 undetectable in non-infected roots.

113 Despite obvious limitations in applied research, many recent plant-pathogen  
114 interaction studies have also taken advantage of *Arabidopsis thaliana*, due to the plethora of  
115 available mutants and its detailed genome annotation. *Arabidopsis*-*Phytophthora*  
116 pathosystems have been established and used to investigate the role of the JA pathway or  
117 related genes in the plant's response to infection, namely *Arabidopsis*-*P. infestans*  
118 (Pajeroska-Mukhtar et al., 2008), *Arabidopsis*-*P. parasitica* (Attard et al., 2010) and  
119 *Arabidopsis*-*P. cinnamomi* (Rookes et al., 2008). Studies using the first two systems reported  
120 that *Arabidopsis* mutants impaired in the JA pathway exhibit enhanced pathogen  
121 susceptibility, pointing to the involvement of JA in the resistance to *Phytophthora*. Moreover,  
122 Attard et al. (2010) and Rookes et al. (2008) describe different responses of roots and leaves  
123 to the pathogen, suggesting that the regulation of defense genes by phytohormones is organ  
124 dependent (Chuberre et al., 2018).

125 In *A. thaliana*, AOS is encoded by a single gene. Given that our transcriptomic data  
126 suggested the involvement of AOS in the resistance of Japanese chestnut to *P. cinnamomi*  
127 (Serrazina et al. 2015), we devised a set of functional and molecular studies to test this  
128 hypothesis. We resorted to the heterologous constitutive gene expression of *C. crenata* AOS  
129 (*CcAOS*) in *A. thaliana* plants of the *Landsberg erecta* (*Ler-0*) ecotype, known for its

130 susceptibility to *P. cinnamomi* (Robinson and Cahill, 2003). An Arabidopsis-*P. cinnamomi*  
131 pathosystem was developed in which plants were root-inoculated under axenic conditions to  
132 analyze the response of transgenic plants expressing CcAOS. To confirm functionality of this  
133 heterologous gene expression, we performed subcellular localization analyses of CcAOS-  
134 eGFP and genetic crosses of an Arabidopsis *aos* mutant line with *CcAOS*.

135 We show that *CcAOS* expression in Arabidopsis is able to delay pathogen progression  
136 along the root, concomitant with an upregulation of JA- and SA-related genes in transgenic  
137 *CcAOS* plants 24 h after infection, suggesting that both signaling pathways are involved in  
138 the response to *P. cinnamomi* at early stages of host tissue invasion. CcAOS-eGFP was  
139 observed in plastids and the expression of CcAOS in *aos* loss-of-function mutants strengthens  
140 a role of the heterologous gene in plant defenses to oomycetes. Together, our results support  
141 an important role of *C. crenata* AOS in biotic stress mechanisms and open new perspectives  
142 towards the generation of new *C. sativa* cultivars.

143

144

## 145 **RESULTS**

### 146 **Transgenic Arabidopsis Plants Expressing CcAOS Exhibit Slightly Accelerated** 147 **Development**

148 Arabidopsis wild type plants from the ecotype Landsberg *erecta* (*Ler-0*), which are  
149 highly susceptible to the oomycete *P. cinnamomi* (Robinson and Cahill, 2003), were  
150 transformed with the *AOS* gene from *Castanea crenata* (*CcAOS*). According to our  
151 sequencing and *in silico* analysis, the *CcAOS* ORF has 1581 nt and is predicted to encode 527  
152 amino acids, with 58.7 kDa molecular weight and 9.01 pI. After a BLASTp in NCBI, the  
153 most related sequences were found to be from *Quercus suber*, *Morus notabilis* and *Camellia*  
154 *sinensis*, showing 96, 80 and 76% identity, respectively (data not shown). The CcAOS amino  
155 acid sequence shares 68% identity with the *A. thaliana* AOS (At5g42650.1) (Supplemental  
156 Fig. S1). The *CcAOS* open reading frame (ORF) was cloned upstream of the eGFP sequence  
157 under the control of the constitutive CaMV35S promoter (Fig. 1A).

158 Three independent Arabidopsis lines stably transformed with pBA-CcAOS-eGFP  
159 were isolated (Fig. 1B,C). Subsequent generations of these plants were analyzed and  
160 compared to the wild type to assess the effects of heterologous *CcAOS* expression.

161 Transgenic *CcAOS* Arabidopsis plants were morphologically very similar to the wild type  
162 although with taller flower stalks (Fig. 2A) and larger rosettes (Supplemental Table S1).  
163 Likewise, *CcAOS* flowers displayed no visible defects (Fig. 2B), but developed earlier  
164 (Supplemental Table S1) and, upon self-fertilization, generated slightly smaller siliques with  
165 fewer seeds (Fig. 2C,D). The root system of transgenic *CcAOS* plants also appeared normal  
166 (Fig. 2E) though exhibiting longer primary root length and more lateral roots ( $P<0.05$ )  
167 (Supplemental Table S1).

168

### 169 **CcAOS Contains a Signal Peptide and Localizes to the Plastid**

170 AOS was reported to be a plastid protein in plants (Tijet and Brash, 2002). We used  
171 an *in silico* tool to predict transit peptides in the *CcAOS* sequence, and a plastid signal peptide  
172 was found encoded in amino acids 1 to 21 (Supplemental Fig. S1). Three independent  
173 transgenic *CcAOS* Arabidopsis lines were used for subcellular localization analysis of the  
174 *CcAOS*-eGFP fusion protein in roots of one-week-old seedlings. Plants transformed with the  
175 pBA-eGFP binary vector alone were used as a control and compared to the three *CcAOS*  
176 lines. Observations were similar in all lines, but to reduce the possibility of artefactual  
177 localization resulting from overexpression, we focused on data stemming from line 3, which  
178 exhibited lower *CcAOS* levels (Fig. 1C).

179 As reported previously and predicted by the presence of the signal peptide, *CcAOS*-  
180 eGFP localization was consistent with accumulation in plastids (Fig. 3A,B) – sparse  
181 punctuated fluorescence of ~1-3  $\mu\text{m}$  near the membrane of highly vacuolized cells, which  
182 were not observed in control experiments (Fig. 3C,D). This pattern is similar to observations  
183 made in *Physcomitrella patens* (Scholz et al., 2012), *Vitis vinifera* (Dumin et al., 2018) and  
184 *Camelia sinensis* (Peng et al., 2018).

185 The expression of *CcAOS*-eGFP in roots was significantly lower than in the aerial  
186 tissues. As imaging of the Arabidopsis small but dense leaves is recognizably difficult, we  
187 also used transiently transformed *Nicotiana benthamiana* epidermal leaf tissue for a detailed  
188 analysis of the subcellular localization and dynamics of *CcAOS*-eGFP fluorescence. The  
189 same pBA-*CcAOS*-eGFP plasmid used to transform Arabidopsis plants was infiltrated into *N.*  
190 *benthamiana* leaves and observations performed after four days (Fig 4). *CcAOS*-eGFP was  
191 found to also concentrate in punctuated structures that co-localize with chloroplasts (Fig. 4A-



192 C) and decorate their outer regions. Interestingly, alongside with bright fluorescent spots of  
193 CcAOS-eGFP accumulation, we could also register a faint reticulate-like distribution (Fig.  
194 4C arrows, Supplemental Fig. S2) that was not present in control experiments. This suggests  
195 that the trafficking of CcAOS to the plastids may involve and/or be mediated by the  
196 endomembrane compartment.

197

## 198 **Expression of CcAOS in Arabidopsis Reduces Susceptibility to *P. cinnamomi* Infection** 199 **and Delays Pathogen Progression**

200 To assess if the constitutive expression of *CcAOS* affects pathogen progression along  
201 the root, we developed an axenic assay where two-week-old Arabidopsis plants growing in  
202 0.5X MS media were inoculated at the root cap with mycelia fragments of a *P. cinnamomi*  
203 virulent strain (Fig. 5). Macroscopically, growth of mycelia along the root system was  
204 observed from 3 days after inoculation (d.a.i.) and their progression scored at 3, 6 and 9 d.a.i.,  
205 after which the pathogen was able to colonize the root completely. The plants transformed  
206 with *CcAOS* showed the lowest percentage of root colonization reaching a maximum of 58%  
207 at 9 d.a.i., whereas wild type plants exhibited similar pathogen progression values at 6 d.a.i.  
208 (Fig. 5A). After colonization of the entire root, mycelia accumulated in the aerial part of the  
209 plant, with their density being notably lower in transgenic *CcAOS* plants (Fig. 5B). No  
210 necrosis was observed in roots, with leaf chlorosis being notable as soon as mycelia reached  
211 the base of the stem. No plant survival was detected two months after inoculation. In addition  
212 to physical progression along the root, we also evaluated pathogen load via quantification of  
213 a *P. cinnamomi* gene (Pyruvate, phosphate dikinase, Pdk) at days 6 and 9 after inoculation.  
214 As expected, the amount of pathogen DNA was significantly higher for wild type plants at  
215 both time points (Fig. 5C).

216 The progression of *P. cinnamomi* mycelia along roots was also cytologically followed  
217 during the first week after inoculation. Until one day after inoculation, finger-like hyphae on  
218 epidermal cells, identified as haustoria, were observed in non-transformed and *CcAOS*  
219 transformed roots (Fig. 6A, B). Haustoria are specialized hyphae capable of penetrating the  
220 host cell for nutrient uptake from the cytoplasm (Redondo et al., 2015). Two days after  
221 inoculation, hyphae reached the cortex both intercellularly and intracellularly (Fig. 6C, D),  
222 and we identified hyphal aggregations corresponding to stromata. These structures can store  
223 nutrients obtained from the host, resulting in *de novo* production of mycelium (and spores)

224 when conditions are favorable (Willetts, 1997). At this time point, unlike with *CcAOS* plants,  
225 hyphae were frequently observed deep in the wild type root, associated with xylem vessels in  
226 vascular tissue (Fig. 6C). None of the described pathogen structures were observed in  
227 association with tissue necrosis.

228 These results show that the *AOS* gene from *C. crenata* delays *P. cinnamomi*  
229 progression *in planta*, when constitutively expressed in Arabidopsis. However, a direct  
230 correlation between quantity of *CcAOS* transcript or protein expressed and the effect on  
231 pathogen infection was not observed in our three plant lines. This could represent either  
232 biological or technical variability, but it is also possible that the plant's net response reflects  
233 an effect of *CcAOS* over-expression on other metabolic parameters.

234

### 235 **Genes Related to Jasmonic Acid and Salicylic Acid Pathways are Upregulated in** 236 **Transgenic *CcAOS* Arabidopsis Plants**

237 The data collected supports a relevant role for *CcAOS* against *P. cinnamomi*  
238 resistance. To gain insight into the underlying defense mechanisms, we analyzed the  
239 expression of genes related to the JA and SA pathways, given their recognized involvement  
240 in biotic stresses (Armengaud et al., 2004; Clarke et al., 2000). The early defense responses  
241 of Arabidopsis against *Phytophthora* pathogens are known to differ between root and leaves  
242 (Attard et al., 2010; Robinson and Cahill, 2003; Rookes et al., 2008). We therefore evaluated  
243 differential gene regulation in root and leaf tissues. The selection of the time points — 3, 12  
244 and 24 hours after inoculation (h.a.i.) — was based on the observation of haustoria as early as  
245 1 day after inoculation. Haustoria are structures of cell invasion that correspond to pathogen  
246 initial biotrophic growth and, according to Attard et al. (2010), SA- and JA-signaling  
247 pathways are promptly triggered when the oomycete penetrates roots.

248 The expression of the endogenous *AtAOS* gene was first assessed to verify transcript  
249 fluctuations in the transgenic plant lines. Figure 7 shows a similar transcript profile in wild  
250 type and transgenic *CcAOS* plants, with a significant upregulation in leaves at 24 h.a.i. but  
251 not in roots. The similar *AtAOS* expression pattern in the wild type and in plants  
252 constitutively expressing *CcAOS*, suggests a non-deleterious effect of the heterologous  
253 protein in the morphology and development of transformed plant lines.

254 Previously, we reported significant differential expression of two JA-marker genes,  
255 *LOX1* and *JAZ10*, in *Castanea* upon *P. cinnamomi* inoculation (Serrazina et al., 2015).  
256 Lipoxygenase-1 (LOX1) is a 9S-lipoxygenase that precedes AOS in the JA pathway and was  
257 found to play an important role in plant defense against pathogens (Vellosillo et al., 2007).  
258 Here we found that *LOX1* shows a significant upregulation only 24 h.a.i. in leaves,  
259 particularly in wild type plants (Fig. 7). By contrast, *JAZ10* exhibited a significant  
260 upregulation 24 h.a.i. in leaves of *CcAOS* plants, while in the wild type this increase was  
261 incipient. *JAZ10* is a member of the JASMONATE-ZIM-DOMAIN family which reportedly  
262 negatively regulates the JA defense response, promoting growth (Guo et al., 2018). In the  
263 susceptible *C. sativa*, the *JAZ10* transcript was found to be downregulated upon *P.*  
264 *cinnamomi* inoculation (Serrazina et al., 2015).

265 A downstream marker of JA pathway, *PLANT DEFENSIN 1.2 (PDF1.2)* was  
266 previously tested in the interaction Arabidopsis - *P. cinnamomi* (Rookes et al., 2008). Here  
267 we observed a significant upregulation of *PDF1.2* after *P. cinnamomi* inoculation in leaves of  
268 *CcAOS* plants at a very early time-point (3 h.a.i.), which was only moderately detected in  
269 wild type susceptible leaves. This further confirms the involvement of *CcAOS* and the JA  
270 pathway in the defense responses. Together, our analysis of JA-related genes suggests that  
271 the over-expression of *CcAOS* stimulates the JA pathway (downstream of *AtAOS*), activating  
272 plant defenses while alleviating growth reduction, thus allowing the plant to reach the  
273 reproduction phase.

274 Our previous work had also suggested that the SA pathway plays an important role in  
275 the local and systemic defense responses to *P. cinnamomi* (Serrazina et al., 2015). We thus  
276 included two SA-related genes in the analysis of transgenic *CcAOS* plants:  
277 NONEXPRESSER OF PR GENES 1 (*NPRI*) and PATHOGENESIS-RELATED GENE 5  
278 (*PR5*). *NPRI* is referred to as a regulator of the interaction between the SA and JA pathways  
279 (Proietti et al., 2018) and has been used as a SA-marker gene in the Arabidopsis-*P.*  
280 *cinnamomi* interplay (Rookes et al., 2008). Here we found minor differences in *NPRI*  
281 expression between mock and pathogen-inoculated plants (less than two-fold up- or down-  
282 regulation, Fig. 7), suggesting that at the tested time-points regulation of JA signaling by SA  
283 is not achieved at the *NPRI* level. On the other hand, *PR5* encodes a thaumatin-like protein  
284 and was used by Eshraghi et al. (2011b) as a defense SA-marker gene in *P. cinnamomi*-  
285 infected Arabidopsis. Our data show that the expression of *PR5* in wild type threatened plants  
286 is downregulated in roots, exhibiting upregulation only 24h after inoculation of leaf tissues.

287 By contrast, inoculated transgenic *CcAOS* plants exhibited *PR5* upregulation 3h after  
288 inoculation both in roots and leaf tissues. These results suggest that the constitutive  
289 expression of *CcAOS* in *Arabidopsis* promotes the expression of pathogenesis-related  
290 proteins through the crosstalk between JA and SA pathways in a *NPR1*-independent manner.

291 Noteworthy, despite *CcAOS* plants showing reduced susceptibility to *P. cinnamomi*,  
292 the susceptible nature of both the transgenic and wild type genotypes is reflected in the  
293 general downregulation of all analyzed genes at 12 h.a.i., which may correspond to an  
294 important stage of pathogen hijacking of JA and SA signaling through its effectors (Herlihy  
295 et al. 2019).

296

### 297 **The *Arabidopsis* and chestnut AOS fulfill distinct roles *in planta***

298 In *Arabidopsis*, loss of function of the single *AOS* gene (AT5G42650) was previously  
299 reported to cause male sterility (Park et al., 2002; von Malek et al., 2002). Here we obtained a  
300 new *Arabidopsis AOS* mutant allele, *aosGK624b02*, from the Gabi-Kat collection of T-DNA  
301 insertion mutants. Such mutant, with Col-0 background, has low susceptibility to *P.*  
302 *cinnamomi* (Robinson and Cahill, 2003). Consistent with the phenotype reported for the  
303 initial *aos* mutant lines (Park et al., 2002; von Malek et al., 2002), our *aosGK624b02* plants  
304 developed anthers with small filaments, incipient siliques and exhibited disturbed pollen  
305 maturation and viability (Supplemental Fig. S3). To investigate a potential role of the *CcAOS*  
306 protein in plant fertility, F1 plants obtained from the genetic crossing of the *aosGK624b02*  
307 mutant (pistils) and a *CcAOS* transgenic line (pollen) were let to self-pollinate and produced  
308 fertile seeds. Upon selection with two selection agents, sulfadiazine and BASTA, 28 resistant  
309 plants from F2 were obtained and grown in soil to maturity. From those, 22 displayed regular  
310 anthers that were able to generate viable pollen and to pollinate the stigma, resulting in  
311 normal siliques (Fig. 8, fertile plants). Upon genotyping, the non-disrupted *AtAOS* allele from  
312 the original transgenic pollen was detected in these plants along with the *CcAOS* transgene  
313 and the T-DNA disrupted *AtAOS* (Supplemental Fig. S4). The remaining 6 F2 plants  
314 produced small anthers with scarce pollen and abnormal siliques (Fig. 8, infertile plants).  
315 Genotyping of these plants detected the presence of *CcAOS* and the disrupted *AtAOS*, but no  
316 wild type *AtAOS* gene (Supplemental Fig. S4). Thus, heterologous expression of the *C.*  
317 *crenata AOS* gene was unable to restore fertility of the *Arabidopsis aos* insertion mutant,  
318 suggesting a distinct biological function from the endogenous *AtAOS*.

319 To evaluate whether the *A. thaliana* AOS is involved in *P. cinnamomi* resistance and  
320 confirm a role for CcAOS in defense responses, we compared mycelia progression in wild  
321 type, *aosGK624b02* mutant and *aosGK624b02:CcAOS* F3 plants upon inoculation with *P.*  
322 *cinnamomi* (Fig. 9). After germination in selection media, two-week-old plants were  
323 inoculated and data collected during 9 days. No statistically significant differences were  
324 observed between wild type and *aosGK624b02* plants (Fig. 9A) indicating that the  
325 endogenous AtAOS does not play a role in resistance to the oomycetes. However, while a  
326 clear accumulation of mycelia was observed in roots and aerial tissues of the Col-0 wild type  
327 and the *aos-GK624b02* mutant, *aosGK624b02:CcAOS* plants exhibited a marked delay in  
328 pathogen advance on roots (Fig. 9B), clearly substantiating the notion that *C. crenata* AOS  
329 confers resistance to *P. cinnamomi* in *A. thaliana*.

330

## 331 **DISCUSSION**

332 We previously proposed an important role for allene oxide synthase (AOS) in the  
333 defense mechanisms of the Japanese chestnut, *Castanea crenata*, against the pathogenic  
334 oomycete *Phytophthora cinnamomi* (Serrazina et al., 2015). To further investigate and  
335 confirm the significance of the *C. crenata* AOS in this biotic stress response, we resorted to  
336 its heterologous expression and functional characterization using an Arabidopsis *Ler-0*  
337 ecotype-*P. cinnamomi* pathosystem. To assess correct localization of the expressed CcAOS  
338 protein, its sequence was fused with the eGFP reporter gene and fluorescence followed both  
339 in transgenic Arabidopsis plants and upon transient expression in *N. benthamiana* leaves.  
340 Furthermore, we used a loss-of-function allele for the endogenous *A. thaliana* AOS gene and  
341 its genetic crossing with the transgenic *CcAOS* Arabidopsis line to confirm a role for the  
342 chestnut AOS protein in pathogen defense and gain insight into the function of the AOS  
343 enzyme in the two plant species.

344

### 345 ***CcAOS* confers Oomycete Resistance to Arabidopsis Without Compromising Plant** 346 **Growth and Fertility**

347 Like the European chestnut *Castanea sativa*, Arabidopsis plants of the *Ler-0* ecotype  
348 are susceptible to *P. cinnamomi* (Robinson and Cahill, 2003). Given the amenability to  
349 transformation and functional characterization studies, we used this model flowering plant to  
350 express the *Castanea crenata* AOS gene, which we previously found to be upregulated in this

351 species upon oomycete infection (Serrazina et al., 2015). Using the strong constitutive 35S  
352 promoter, *CcAOS* was constitutively expressed in Arabidopsis, as assessed in three  
353 independent transformed plant lines by fluorescence confocal microscopy and western  
354 blotting.

355 Our results show that, morphologically, transgenic *CcAOS* plants display mild  
356 differences when compared to wild type. Arabidopsis plants expressing the *CcAOS* transcript  
357 are distinguished by its higher growth rate, smaller siliques and lower number of seeds when  
358 compared with their WT counterparts. As previously reported by Farmer and Goosens  
359 (2019), higher basal level of JA due to an upregulation of *CcAOS*, resulted in plants with  
360 higher growth rate, a mechanism that could also be occurring in our heterologous lines.  
361 Interestingly, Kubigsteltig and Weiler (2003) obtained several Arabidopsis lines affected in  
362 the transcriptional control of *AOS* and, from eight lines showing constitutive *AOS* expression,  
363 all showed signs of growth inhibition, suggesting a different role for *CcAOS* which may  
364 account for the resistance exhibited by *C. crenata*. In two of those lines, flower development  
365 and anther size were so affected that they failed to set seed (Kubigsteltig and Weiler, 2003).  
366 In the present study, transgenic *CcAOS* plants were still able to generate viable seed set,  
367 though Kubigsteltig and Weiler (2003) did not present results on the fertilization level of the  
368 other classes of fertile mutants that would enable a comparison with *CcAOS* plants.  
369 Regardless that in all *CcAOS* plants a correlation was not evident between transcripts levels  
370 and protein expression (or with pathogen progress/quantity), in all lines isolated the pathogen  
371 progression was delayed, and the amounts of pathogen DNA were reduced when compared to  
372 non-transformed plants. Our data therefore provides compelling evidence that the *C. crenata*  
373 *AOS* gene positively regulates plant tolerance to oomycete infection in Arabidopsis.

374 The implemented Arabidopsis – *P. cinnamomi* pathosystem in axenic conditions  
375 provided us with a controlled and confined system which allows both the following of the  
376 pathogen progression and plant adaptation throughout the time. We focused on the first 5  
377 d.a.i. for microscopic observations of root and pathogen tissues and on 12 d.a.i. for mycelia  
378 progression along the root system. After these time periods a substantial invasion of the  
379 mycelia over and inside root tissues hampered further clear observations. Despite the massive  
380 hyphal invasion, neither wild type or transgenic *CcAOS* plants showed necrotic tissues in  
381 roots. Arabidopsis ecotypes less susceptible to *P. cinnamomi*, such as Col-0, promote the  
382 formation of callose plugs in root infected areas, as well as hypersensitive response and  
383 necrotic lesions in leaves, in order to restrain the pathogen (Robinson and Cahill, 2003;  
384 Rookes et al., 2008). Here, *Ler-0* root staining with aniline blue did not reveal distinct

385 production of callose plugs (not shown), in agreement with the susceptibility phenotype  
386 described for this ecotype (Robinson and Cahill, 2003). By contrast, the transgenic *CcAOS*  
387 plants generated in the *Ler-0* background exhibited a significant reduction in mycelia  
388 progression along roots and in *P. cinnamomi* DNA levels, demonstrating a notable  
389 contribution of the *C. crenata* AOS to plant defense.

390

### 391 **CcAOS Role Involves Changes in the Jasmonic and Salicylic Acid Pathways**

392 Our results on the expression of endogenous *AOS* in inoculated *Ler-0* wild type plants  
393 agree with a susceptibility phenotype — virtually unaffected in roots and significantly  
394 upregulated in leaves 24 h after inoculation (h.a.i.). This is consistent with reports that AOS  
395 activity is highly enhanced in *Arabidopsis* leaves after wounding (Laudert et al. 2000). Our  
396 observation that endogenous *AOS* expression follows a similar pattern in transgenic *CcAOS*  
397 plants supports a non-deleterious effect of the heterologous protein in the morphology and  
398 development of transformed plant lines. Taken together, our data indicate that the lower  
399 susceptibility of transgenic *CcAOS* plants to the oomycetes *P. cinnammoni* results specifically  
400 from the introduction (and expression) of the *CcAOS* gene and its downstream effects.

401 JA and SA are two of the main phytohormones implicated in plant responses against  
402 pathogens (Clarke et al., 2000; Rookes et al., 2008). Most of the studies performed so far  
403 were conducted in leaves and reported an antagonistic interaction between JA and SA  
404 signaling (Chuberre et al., 2018). However, Attard et al. (2010) reported that in roots of  
405 *Arabidopsis thaliana* both phytohormones are activated coordinately upon *Phytophthora*  
406 *parasitica* infection, suggesting that the early defense activation differs between roots and  
407 leaves. In the present study, we observed significant changes in the transcript levels of JA-  
408 and SA- marker genes in *Arabidopsis Ler-0* inoculated with *P. cinnamomi*. Lower expression  
409 levels were recorded in roots in agreement with Rookes et al. (2008) and Attard et al. (2010);  
410 the root was the site of pathogen inoculation and *Ler-0* plants present the most susceptible  
411 background, allowing the pathogen to efficiently suppress host immunity. The expression of  
412 *LOX1*, *AOS*, *JAZ10*, *PDF1.2* (JA-related) and *PR5* (SA-related) showed relevant upregulation  
413 in leaves at 24 h.a.i., revealing an amplification of the response far from the sites of  
414 inoculation (roots). Once a response to the pathogen is triggered, roots can induce a response  
415 in non-challenged organs (such as leaves), corresponding to a systemic acquired resistance  
416 (SAR, reviewed by Chuberre et al., 2018).

417 In roots of transgenic *CcAOS* plants, upregulation of *LOX1* expression at 24 h.a.i. was  
418 higher than in the wild type counterpart. This agrees with our predicted role of *CcAOS* in the

419 response to biotic stress since LOX1 acts in the systemic defense against bacterial pathogens  
420 in *Arabidopsis* roots as shown by Vicente et al. (2012). In this report, the authors suggested  
421 that LOX1 mediates the production of oxilipins of the 9-lipoxygenase pathway which, in  
422 turn, activate SAR and regulate lateral root development (Vicente et al., 2012). In  
423 *Arabidopsis* roots, 9-oxilipins may activate cell wall-based responses to the fungus  
424 *Golovinomyces cichoracearum* (Marcos et al., 2015). A causal relationship between the  
425 constitutive expression of CcAOS and the higher levels of *LOX1* in roots cannot be  
426 unequivocally established; LOX1 is in the 9-lipoxygenase pathway and AOS is in the 13-  
427 lipoxygenase pathway. However, a role for oxylipins in the adaptation to adverse growth  
428 conditions and defense responses is well established (Armengaud et al., 2004) and their  
429 biosynthesis is initiated by the action of 9-LOX and 13-LOX (Vellosillo et al., 2007). Thus, a  
430 higher metabolism of common polyunsaturated fatty acids may stimulate both pathways.  
431 Moreover, LOX proteins expressed upon apple climacteric ripening were found to have dual  
432 (9/13) positioning specific lipoxygenase function (Schiller et al., 2015).

433 *JAZ10* upregulation in leaves of transgenic *CcAOS* plants 24 h.a.i. was also clear and  
434 in contrast with the absence of differential regulation in roots. Yan et al. (2007) suggested  
435 that *JAZ10* is responsible for a repression of JA-regulated growth retardation in wounded  
436 roots of the *Arabidopsis* Col-0 ecotype. However, the absence of differential regulation of  
437 *JAZ10* in roots upon *P. cinnamomi* inoculation suggests an inhibitory effect of the pathogen  
438 on the defense response in its site of action. In leaves, *JAZ10* expression showed opposite  
439 regulation, in phase with the upregulation of *AOS* at the same time-point (24 h.a.i.). Leaves  
440 are directly exposed to light and, under such conditions, the JA pathway is highly inducible,  
441 with a higher expression of *AOS* that leads to biologically active jasmonoyl-isoleucine (JA-  
442 Ile) production (Farmer and Goossens, 2019). The availability of JA-Ile stimulates the fine  
443 modulation of the JA signaling (e.g. by *JAZ10*) which could promote growth and recovery  
444 from an infection scenario, giving the plant a chance of reproduction (Farmer and Goossens,  
445 2019; Guo et al., 2018). JAZ proteins, through immunity-repression of JA pathway, promote  
446 growth to limit carbon starvation associated with strong defense responses and enable  
447 reproduction (Guo et al., 2018).

448 Among the analyzed genes, *PDF1.2* showed the highest up-regulation in leaves of  
449 transgenic *CcAOS* plants 3 h.a.i., suggesting that *CcAOS* promotes the synthesis of JA and  
450 consequently the expression of the JA-responsive gene *PDF1.2*. The regulation pattern  
451 corroborates the abundance of *PDF1.2* transcript 2.5 h.a.i. in leaves infected with *P.*  
452 *parasitica* (Attard et al., 2010). The noticeable upregulation of *PDF1.2* at 3 h.a.i. contrasts



453 with the modest upregulation in wild type leaves, pointing to a relevant role of the plant  
454 defensin PDF1.2 in the defense response of *CcAOS* plants to the pathogen.

455 *NPR1* and *PR5* have been used as markers for SA signaling. *NPR1* is associated to  
456 SAR as a negative regulator of the JA pathway (Derksen et al. 2013). In our study, the  
457 upregulation of *PR5* in wild type and transgenic *CcAOS* leaves was preceded by a weak  
458 induction of *NPR1*, suggesting that the crosstalk between JA and SA pathways is not relevant  
459 at the *NPR1* level. Similarly, Eshragui et al. (2011a) reported that the application of  
460 phosphite (a systemic chemical elicitor of defense responses to *P. cinnamomi*) to *Ler-0*  
461 leaves, induced the expression of *PR5*, but not of *NPR1*. Our results corroborate such report  
462 and suggest a cooperation between the SA and JA pathways in the defense response  
463 independent of *NPR1*. Previously, Clarke et al. (2000) described a SA-mediated *NPR1*-  
464 independent resistance response that requires JA and ethylene signaling, in *Arabidopsis*  
465 challenged with the oomycete *Perenospora parasitica*. The most significant upregulation of  
466 *PR5* 24 h.a.i. in leaves and roots of transgenic *CcAOS* plants points to a relevant role of SA  
467 signaling in the defense response to *P. cinnamomi*. The induction of *PR5* in *CcAOS* roots, in  
468 opposition to the overall downregulation in wild type roots, indicates that the heterologous  
469 expression of *CcAOS* affects the regulation of the SA pathway to improve the early steps of  
470 the defense response to the pathogen.

471

## 472 **CcAOS Traffics to Plastids and Fulfills a Different Biological Function from AtAOS**

473 The viability of heterologous expression of *CcAOS* as a tool to engineer cultivars less  
474 susceptible to pathogen attack requires confirmation that the protein is functional in pathogen  
475 defense and, inherently, that it localizes to the correct sub-cellular compartment to perform its  
476 catabolic activity. Here we addressed these two issues through expression of the *C. crenata*  
477 AOS in different *A. thaliana* backgrounds and live imaging of a *CcAOS*-eGFP fusion protein  
478 both in transgenic *Arabidopsis* plants and in *N. benthamiana* leaf epidermal cells.

479 Concerning the protein localization, we observed that an eGFP-*CcAOS* fusion protein  
480 was targeted to the expected final destination, the plastid. However, and quite interestingly,  
481 the observations performed in leaf epidermal cells of *N. benthamiana* showed trafficking  
482 through reticulate-like structures. It is tempting to speculate that the lower oomycete  
483 susceptibility induced by *CcAOS* results from post-translational processing of the protein  
484 through the endomembrane compartment. Endoplasmic reticulum (ER)-bodies accumulate  
485 defense proteins (Chuberre et al., 2018) and the ER is now recognizably a hub to sort proteins  
486 to plastids and mitochondria (Bellucci et al., 2018). Activation of endomembrane trafficking

487 associated to an increase in salicylic acid levels during plant defense has also been reported  
488 (Ruano and Scheuring, 2020). Although appealing, this hypothesis clearly requires further  
489 experimental evidence.

490 Most significantly, when compared to the wild type plants, the expression of *CcAOS*  
491 in the *aos* mutant line resulted in a beneficial effect upon *P. cinnamomi* attack. This suggests  
492 that even in an *aos*-JA deficient background, CcAOS is sufficient to boost pathogen defense.  
493 The absence of significant differences in pathogen progression between the wild type and a  
494 newly isolated *aos* knockout, for which we confirmed previous reports of reduced fertility  
495 (Park et al., 2002; von Malek et al., 2002), indicates that the endogenous *AtAOS* does not play  
496 a significant role in the defense to *P. cinnamomi*. In support of this observation, Rookes et al.  
497 (2008) did not find differences between wild type Col-0 and the JA-biosynthesis mutants *coi1*  
498 and *jar1* upon *P. cinnamomi* root inoculation. Nonetheless, genetic crossing of transgenic  
499 CcAOS plants with the *aos* mutant also resulted in a beneficial effect upon *P. cinnamomi*  
500 attack, corroborating a role for the chestnut enzyme in the defense response to the pathogen.  
501 Noteworthy, expression of *CcAOS* in the male sterile *aos* mutant background led to plants  
502 that were morphologically similar to the wild type but still infertile. This indicates that,  
503 although functionally active in Arabidopsis, CcAOS fulfills distinct functions from the  
504 endogenous Arabidopsis AOS.

505 Taken together, the data presented here support the notion that CcAOS promotes  
506 resistance of the Japanese chestnut to oomycete pathogens and that its constitutive expression  
507 could be a valid tool to engineer cultivars from other species to overcome susceptibility (e.g.  
508 *C. sativa*) (Santos et al., 2017). Moreover, accordingly to Camisón et al. (2019), the  
509 expression of CcAOS seems to induce the jasmonic and salicylic acid pathways (upregulation  
510 of *LOX1*, *JAZ10* and *PR5*) contributing to a more efficient host response in the initial stages  
511 of *P. cinnamomi* infection without compromising growth and fertility. It further raises new  
512 questions about the evolution of plant lipid regulation and how protein function is achieved  
513 beyond catalytic activity.

514 It should be noted that the basis of the resistance to pathogens is multigenic and that  
515 the CcAOS gene by itself does not fully revert the susceptibility phenotype of *Ler-0*. In fact,  
516 *CcAOS* plants did not show hypersensitive response or the characteristic production of callose  
517 plugs (Rookes and Cahill, 2008). Nonetheless, the signs of enhanced systemic acquired  
518 resistance from roots to leaves (suggested by the expression of *LOX1* and *PR5* in inoculated  
519 *CcAOS* plants) point to a priming of defense responses in surrounding plants through the  
520 volatile compounds from JA- and SA-pathways (Truman et al., 2007).

521

522

## 523 MATERIALS AND METHODS

### 524 **Plant Material and Growth Conditions**

525         The *Arabidopsis thaliana* (L.) Heynh. ecotype Landsberg erecta (*Ler-0*) was used for  
526 transformation with the *C. castanea* AOS gene. For all experiments, *Arabidopsis* seeds were  
527 stratified in water at 4°C for 48-72h and surface sterilized for 1 min in 70% ethanol, 10 min in  
528 30% bleach and 0.5% Tween 20, with mechanical mixing, followed by three washes with  
529 sterile distilled water. After, seeds were transferred to soil (turf and vermiculite, 3:1 mix) and  
530 periodically watered. *Arabidopsis* plants were grown at 22 °C and 70% relative humidity,  
531 with a 16 h: 8 h light: dark photoperiod using walk-in growth chambers (Aralab, Rio de  
532 Mouro, Portugal). Growth of *Arabidopsis* plants for transformation was under a 12h:12h  
533 light:dark photoperiod.

534         *Nicotiana benthamiana* Domin plants, used for transient transformation of leaf  
535 epidermal cells, were cultured from seed in soil (turf and vermiculite, 6:1 mix) and grown at  
536 25 °C and 70% relative humidity, with a 16 h: 8 h light: dark photoperiod, in a walk-in  
537 chamber.

538         For selection of transformed seeds, stratification was followed by surface sterilization.  
539 Seeds were germinated on 9 cm diameter plates with 0.5X Murashige and Skoog medium  
540 with 1% agar, supplemented with 10 mg/L of BASTA (Glufosinate-ammonium  
541 PESTANAL®, Riedel-de Haën, Germany). After 7-14 days, all green seedlings were  
542 transferred to soil. The mutant genotype for *allene oxide synthase* (AOS, AT5G42650),  
543 acquired from GABI-KAT (GK\_624b02, Kleinboelting et al., 2012) was in the Col-0  
544 background and was cultured as above for *Arabidopsis* transformation, but selection was  
545 achieved with 5.0 mg/L of Sulfadiazine (Sigma-Aldrich, St. Louis, MI, USA).

546         For transgenic plant phenotyping, five seeds were germinated in the upper area of  
547 100x51 mm squared plates or seedlings were transferred to soil after BASTA selection. For  
548 plant inoculation with *Phytophthora cinnamomi*, assays were performed *in vitro* and  
549 axenically as for plant phenotyping in squared plates.

550         The GK\_624b02 AOS mutant line was crossed to the transgenic *CcAOS* lines, which  
551 were used as pollen donors to pistils from the mutant. Seeds from F1 and F2 were germinated  
552 in the presence of two selection agents, sulfadiazine and BASTA, and plants were transferred  
553 to soil and let to auto pollinate. F2 plants were genotyped as described below for the isolation

554 of the transgenic *CcAOS* lines (primers for *AtAOS* and T-DNA insertion were as  
555 recommended upon <https://www.gabi-kat.de/db/primerdesign.php> and [https://www.gabi-](https://www.gabi-kat.de/faq/vector-a-primer-info.html)  
556 [kat.de/faq/vector-a-primer-info.html](https://www.gabi-kat.de/faq/vector-a-primer-info.html) respectively). Seeds from F3 were germinated in the  
557 same selection conditions and plants grown *in vitro* for pathogen-inoculation (see below).

558 *Arabidopsis* wild type Col-0, *aos* mutants and *aos:CcAOS* two-week-old plants  
559 inoculation with *P. cinnamomi* and mycelia progression was performed and analyzed as  
560 described below.

561

### 562 **Isolation and Cloning of the *Castanea crenata* Allene Oxide Synthase ORF**

563 The nucleotide sequence of the *C. crenata* AOS transcript was obtained from the  
564 sequenced root transcriptome after *P. cinnamomi* inoculation (Serrazina et al., 2015). After a  
565 BLASTn and comparison of the sequences with highest homology, a prediction of the ORF  
566 and translation to the amino acid sequence was achieved. The *CcAOS* and *Arabidopsis*  
567 *thaliana* AOS amino acid sequence were aligned using BioEdit  
568 (<https://bioedit.software.informer.com>, version 7.0.5). The existence and position of the  
569 signal plastid peptide was predicted using Localizer (<http://localizer.csiro.au/>, Sperschneider,  
570 et al., 2017). Specific primers were designed at the 5' and 3' ends of the *C. crenata* AOS  
571 ORF (forward 5'-3' ATGGCATCCACTTCTCTAGCTTTTC, reverse 5'-3'  
572 TCAAAAGCTGGCCTTTTTGAG), which was amplified from inoculated *C. crenata* double  
573 stranded cDNA with Phusion High-Fidelity DNA Polymerase (Thermo Fisher Scientific,  
574 Waltham, MA, USA), following the manufacturers' instructions. The expected amplification  
575 product was run in a 1% agarose gel, excised and purified with QIAquick Gel Extraction Kit  
576 (Qiagen, Hilden, Germany). The product was then cloned in pJET1.2/blunt within CloneJET  
577 PCR Cloning Kit (Thermo Fisher Scientific, Waltham, MA, EUA) and sequenced (Stabvida,  
578 Caparica, Portugal). After confirming its sequence, the *C. crenata* AOS ORF was sub-cloned  
579 in the pBA-eGFP binary vector, between XhoI and BamHI restriction sites and without the  
580 stop codon, resulting in pBA-*CcAOS*-eGFP. In this vector, 35S promoter drives the  
581 expression of *CcAOS*-eGFP and the nucleotide sequence was confirmed by Sanger  
582 sequencing.

583

### 584 **Plant Transformation**

585 The pBA-*CcAOS*-eGFP vector was inserted in the *Agrobacterium tumefaciens* strain  
586 GV3101 and *Arabidopsis Ler-0* plants transformed following a modified flower-dip method

587 (drop-by-drop method, Martinez-Trujillo et al., 2004). The resulting seeds were germinated  
588 in plates supplemented with BASTA for transformant screening. Leaf samples from  
589 putatively transformed 1-month-old plants were genotyped to verify the presence of *C.*  
590 *crenata* AOS ORF and eGFP in the genomic DNA, with KAPA3G Plant PCR Kit (Kapa  
591 Biosystems, Wilmington, MA, USA), following Section 2: Direct PCR. The primers used to  
592 amplify eGFP were: forward 5'-3' GGGACGTCATGGTGAGCAAGG and reverse 5'-3'  
593 CGTCCATGCCGAGAGTGATCC. Transformed plants were selected and let self-pollinate  
594 to generate F1. Plants of the F1 and F2 generation were also screened with BASTA and  
595 genotyped to confirm a stable transformation in each transformed line. Seeds, seedlings and  
596 plants derived from the F2 were used for subsequent heterologous protein localization,  
597 phenotyping and inoculation assays with *P. cinnamomi*.

598 For transient expression of the fusion CcAOS-eGFP protein in *Nicotiana*  
599 *benthamiana*, 5-6-week-old plants were used and leaf infiltration with Agrobacterium strain  
600 GV3101 (Sparkes et al., 2006) harboring pBA-CcAOS-eGFP or the empty pBA-eGFP vector  
601 performed.

602

### 603 **Subcellular Localization of the *Castanea crenata* AOS protein in Arabidopsis**

604 Roots of one-week-old Arabidopsis lines transformed with CcAOS-eGFP or with the  
605 corresponding empty vector were observed in a Leica SP-E confocal microscope (Leica  
606 Microsystemas, Carnaxide, Portugal) with the settings described below and the 488nm laser  
607 line.

608 In transiently transformed *N. benthamiana*, sections of leaves from the infiltrated  
609 areas were observed 2, 3 and 4 days after infiltration. Imaging was achieved in a Leica SP8  
610 confocal microscope (Leica Microsystemas, Carnaxide, Portugal). Optical sections (ca 2  $\mu$ m  
611 thick) were acquired using a x63 ACS APO water objective (NA=1.15), <10% laser intensity  
612 (488 nm and 552 nm laser lines) and operating in the mode 1072 x 1072, 600 Hz (c. 0.3/s per  
613 frame). Image or Z-stack acquisition was linear, ensuring no signal bleed through.

614 Images were processed using the Image J software (<https://imagej.nih.gov/ij/>). All  
615 observations were repeated twice with at least 3 individual plants per genotype.

616

### 617 **Phenotypical Analysis of Transgenic Arabidopsis Lines**

618 Plants were grown as described above, with growth and root parameters being  
619 measured on images of 1-month (potted plants) and 13-day old plants (*in vitro* plants),  
620 respectively, using the Image J software. Five plants per genotype were considered.

621 Flowering time, silique length and silique number were scored in five plants per  
622 genotype, with three flowers/siliques being collected per plant.

623 Results represent means of three independent assays, and Student's *t*-test was used for  
624 statistical analysis.

625

### 626 **Analysis of *Castanea crenata* AOS Expression Levels in Transgenic Arabidopsis Lines**

627 Total RNA was isolated from plants of wild type or CcAOS transformed lines from  
628 six plants (of each condition) using the RNeasy Plant Mini Kit (Qiagen, Hilden, Germany),  
629 followed by treatment with Turbo DNase kit (Thermo Fisher Scientific, Waltham, MA,  
630 USA). Three biological replicates per condition were prepared. Total RNA (3.6 µg) was used  
631 as template for reverse transcription with RevertAid H Minus Reverse Transcriptase (Thermo  
632 Fisher Scientific, Waltham, MA, USA) and primed with an oligo(dT) primer. Specific  
633 primers for CcAOS were designed with PrimerSelect 5.03 (DNASTAR Inc., Madison, WI,  
634 USA) (forward 5'-3' CACGCGTCGATTTATTGTCC and reverse 5'-3'  
635 TTTGGTGGGTTCGGCTTGTT).

636 Each cDNA was diluted 1:40 and 4 µL (18 ng) used per reaction, in a 25 µL final  
637 volume using Maxima SYBR Green qPCR Master Mix kit (Thermo Fisher Scientific,  
638 Waltham, MA, USA). A final concentration of 0.2 µM of each primer was used in a StepOne  
639 Real-Time PCR system (Applied Biosystems, Foster City, California, USA). Quantitative  
640 PCR (qPCR) reactions started with a denaturation step at 95°C for 10 min followed by 40  
641 cycles of denaturation at 95°C for 15 s and annealing temperature (60 °C) for 30 s. Each set  
642 of reactions included a no template control and two technical replicates. Dissociation curves  
643 were used to analyze nonspecific PCR products.

644 To normalize expression data, *ACTIN2* was used. Oligos were forward 5'-3'  
645 GGTATTGTGCTGGATTCTGG and reverse 5'-3' CGCTCTGCTGTTGTGGTGA.  
646 Annealing temperature was 60 °C. 18srRNA was also used for normalization with identical  
647 results to *ACTIN2*. Oligos were forward 5'-3' AGTCGGGGGCATTCGTATTT and reverse  
648 5'-3' ATCCCTGGTCGGCATCGTTT.

649 Gene expression was calculated using the  $\Delta\Delta CT$  method (Schmittgen & Livak, 2008).  
650 The highest level of expression in transformed line CcAOS2 was used as calibrator (set to 1)  
651 to which all the other samples were compared. Student's *t*-test was used for statistical  
652 analysis.

653

### 654 **Analysis of *Castanea crenata* AOS Protein Levels in Transgenic Arabidopsis Lines**

655 Two-week-old plants transformed with CcAOS or the empty vector were first  
656 checked for the presence of AOS-eGFP or eGFP expression with a Olympus BX51  
657 fluorescence microscope (Labocontrole, Lisbon, Portugal) equipped with a 470-  
658 490/DM505/LP515 filter, and a TIS 2MP DFK23U274 RGB camera (Infaimon, Aveiro,  
659 Lisbon, Portugal). A maximum of 100 mg of plants from each genotype was stored in  
660 triplicate at -80 °C. Tissue was grinded with liquid nitrogen before the addition of 300 µL of  
661 lysis buffer. RIPA buffer (radioimmunoprecipitation assay buffer;  
662 <https://www.abcam.com/protocols/sample-preparation-for-western-blot>) was used to obtain a  
663 protein extract with plastid proteins. Protease Inhibitor Cocktail (Sigma-Aldrich, St. Louis,  
664 MI, USA) was added freshly to the lysis buffer as recommended.

665 The total protein in each extract was quantified using the Bio-Rad Protein Assay (Bio-  
666 Rad, Hercules, CA, USA), and 24 µg run in a 10% SDS-PAGE. A monoclonal antibody for  
667 eGFP (Roche, Basel, Switzerland) was used for Western blotting analysis at 1:10000 dilution,  
668 followed by Peroxidase Affinipure Goat Anti-Mouse IgG (Jackson Immunoresearch, Ely,  
669 UK) at 1:10000, before detection with NZY ECL Supreme HRP substrate (NZYtech, Lisboa,  
670 Portugal).

671

### 672 ***P. cinnamomi* Inoculation Assays**

673 Liquid cultures of *P. cinnamomi* (isolate IMI 340340 from the University of Trás-os-  
674 Montes and Alto Douro) were prepared in 50 mL of 1% PDB before incubation in a rotary  
675 shaker at 24 °C and 100 rpm for 48 h. Mycelia were then resuspended in 5 mL of 1% PDB  
676 and blended at high speed for 1 min. The concentration of mycelial fragments in the stock  
677 suspension was quantified with the aid of a hemocytometer and the mycelial suspension  
678 adjusted with 1% PDB to reach final concentration of approximately  $1.0 \times 10^4$  fragments/mL.

679 Two-week-old wild-type *Ler-0* and transgenic *CcAOS* lines, wild-type *Col-0*, *aos*  
680 mutants and F3 *aos:CcAOS* Arabidopsis plants, growing axenically *in vitro*, were inoculated  
681 at the root cap with 10 µL of mycelia fragment suspension. In mock inoculations, potato  
682 dextrose broth 1% was added. Plates were covered with a black cloth overnight to promote  
683 infection. The following day, the cloth was removed, the plates were shaded in the root area  
684 and placed vertically.

685 Photographs were taken at 3, 6 and 9 days after inoculation and measurements of  
686 mycelia progression along root performed using the Image J software  
687 (<https://imagej.nih.gov/ij/>). Mycelia progression was also observed microscopically at 1, 2, 3,  
688 4, 5 and 6 days after inoculation; oomycete tissues in Arabidopsis roots were dyed with

689 trypan blue 0,05% in a solution of lactoglycerol [lactic acid, glycerol, and water (1:1:1)] for 5  
690 min and rinsed in lactoglycerol before observation in an Olympus BX51 microscope coupled  
691 with a TIS 2MP DFK23U274 RGB camera.

692 At least 10 plants per genotype were analyzed in 3 independent inoculation assays.

693

#### 694 **Quantification of *in Planta P. cinnamomi* Growth**

695 Genomic DNA was isolated from all Arabidopsis genotypes at 6 and 9 days after  
696 inoculation using the DNeasy Plant Mini Kit (Qiagen, Hilden, Germany).

697 Quantification of *P. cinnamomi* growth *in planta* was achieved through the  
698 quantification of the *Pyruvate, phosphate dikinase* gene (*Pdk*, GenBank accession  
699 FJ493007.1) by qPCR, based on Eshraghi et al. (2011a). Primers for *Pdk* were forward 5'-3'  
700 GACGAGAGCGAGACAAGAA and reverse 5'-3' CAAACGCACAAACGCACAC, and the  
701 melting temperature was 58 °C. The amount of genomic DNA used per reaction was 1.84 ng  
702 and the reaction mix is described above using 3 biological replicates (5 plants per replicate)  
703 and 2 technical replicates. *Monensin sensitivity 1* (*Mon1*, At2g28390.1) of the SAND family  
704 protein served as a reference gene (Schlaeppli et al., 2010), using primers forward 5'-3'  
705 GTGGCGGCGATGATAATGAT and reverse 5'-3' CTAGTTCCCGCCACACCTT. *RNA*  
706 *Processing Factor 3* (*RPF3* At1g62930.1) was also used for normalization (Czechowski et  
707 al., 2005) yielding identical results to *Mon1*. Oligos were forward 5'-3'  
708 GAGTTGCGGGTTTGTGGAG and reverse 5'-3'  
709 CAAGACAGCATTTCAGATAGCAT.

710 *P. cinnamomi* biomass in inoculated plants was calibrated with the level of inoculated  
711 wild type *Ler-0* plants. The experiment was repeated in three independent assays, and  
712 Student's *t*-test was used for statistical analysis.

713

#### 714 **Expression Analysis of Genes Related to the Jasmonic and Salicylic Acid Pathways**

715 Total RNA was isolated from root and aerial tissue of wild type *Ler-0* and transgenic  
716 *CcAOS* lines at 3, 12 and 24 hours after inoculation, using the RNeasy Plant Mini Kit  
717 (Qiagen, Hilden, Germany), followed by treatment with Turbo DNase kit (Thermo Fisher  
718 Scientific, Waltham, MA, USA). Total RNA, cDNA, reaction reagents and cycling were as  
719 described above, and 5.9 ng of cDNA were used per reaction. Primer sequences for each gene  
720 are listed in Supplemental Table S2.



721 Three biological replicates (5 plants per replicate) and 2 technical replicates were  
722 analyzed. To normalize expression data, *Mon1* and *RPF3* were used, and gene expression  
723 levels were calculated as described above and calibrated with the respective mock-inoculated  
724 sample at each given time-point after inoculation. Results are from three independent assays,  
725 and Student's *t*-test was used for statistical analysis.

726

727

## 728 ACKNOWLEDGMENTS

729 The authors are grateful to N.-H. Chua for the pBA-eGFP binary vector, V. Nunes (IGC) for  
730 supervising and assistance with Arabidopsis transformation, E. Novo-Uzal (IGC) for  
731 supervising and assistance with western blotting, A.B. da Silva (FCUL) for advising on  
732 Arabidopsis phenotyping, T. Braga (FCUL) for assistance with *N. benthamiana* imaging and  
733 A. M. Fortes (FCUL) for critical reviewing of the manuscript. Imaging was performed at the  
734 Faculty of Sciences of the University of Lisbon's Microscopy Facility, a node of the  
735 Portuguese Platform for BioImaging (PPBI-POCI-01-0145-FEDER-022122).

736

## 737 REFERENCES

- 738 **Armengaud P, Breitling R, Amtmann A** (2004) The potassium-dependent transcriptome of  
739 Arabidopsis reveals a prominent role of jasmonic acid in nutrient signaling. *Plant Physiol.* **136**:  
740 2556–2576.
- 741 **Attard A, Gourgues M, Callemeyn-Torre N, Keller H** (2010) The immediate activation of defense  
742 responses in Arabidopsis roots is not sufficient to prevent *Phytophthora parasitica* infection.  
743 *New Phytol* **187**: 449-460. [10.1111/j.1469-8137.2010.03272.x](https://doi.org/10.1111/j.1469-8137.2010.03272.x)
- 744 **Balfagón D, Sengupta S, Gómez-Cadenas A, Fritschi FB, Azad RK, Mittler R, Zandalinas SI**  
745 (2019) Jasmonic Acid Is Required for Plant Acclimation to a Combination of High Light and  
746 Heat Stress. *Plant Physiology* **181**: 1668-1682. [10.1104/pp.19.00956](https://doi.org/10.1104/pp.19.00956)
- 747 **Bellucci M, De Marchis F, Pompa A** (2018) The endoplasmic reticulum is a hub to sort proteins  
748 toward unconventional traffic pathways and endosymbiotic organelles. *J Exptl Bot* **69**: 7–20.  
749 <https://doi.org/10.1093/jxb/erx286>
- 750 **Camisón Á, Martín MÁ, Sánchez-Bel P, Flors V, Alcaide F, Morcuende D, Glória Pinto G, Solla**  
751 **A** (2019) Hormone and secondary metabolite profiling in chestnut during susceptible and  
752 resistant interactions with *Phytophthora cinnamomi*. *J Plant Physiol* **241**: 153030.  
753 <https://doi.org/10.1016/j.jplph.2019.153030>
- 754 **Chapple C** (1998) Molecular-genetic analysis of plant cytochrome P450-dependent monooxygenases.  
755 *Ann Rev Plant Physiol Plant Mol Biol* **49**: 311-343.  
756 <https://doi.org/10.1146/annurev.arplant.49.1.311>
- 757 **Chen YC, Wong CL, Muzzi F, Vlaardingerbroek I, Kidd BN, Schenk PM** (2015) Root defense  
758 analysis against *Fusarium oxysporum* reveals new regulators to confer resistance. *Sci Rep* **4**:  
759 5584. <https://doi.org/10.1038/srep05584>

- 760 **Chuberre C, Plancot B, Driouich A, Moore JP, Bardor M, Bruno G, Vicié M** (2018) Plant  
761 Immunity Is Compartmentalized and Specialized in Roots. *Frontiers Pl Sci* **9**: 1692.  
762 [10.3389/fpls.2018.01692](https://doi.org/10.3389/fpls.2018.01692)
- 763 **Clarke JD, Volko SM, Ledford H, Ausubel FM, Dong X** (2000) Roles of salicylic acid, jasmonic  
764 acid, and ethylene in *cpr*-induced resistance in *Arabidopsis*. *Plant Cell* **12**: 2175-2190. DOI:  
765 [10.1105/tpc.12.11.2175](https://doi.org/10.1105/tpc.12.11.2175)
- 766 **Czechowski T, Stitt M, Altmann T, Udvardi MK, Scheible W-R** (2005) Genome-Wide  
767 identification and testing of superior reference genes for transcript normalization in *Arabidopsis*.  
768 *Plant Physiol* **139**: 5-17. <https://doi.org/10.1104/pp.105.063743>
- 769 **De Coninck B, Timmermans P, Vos C, Cammue BPA, Kazan K** (2014) What lies beneath:  
770 belowground defense strategies in plants. *Trends Pl Sci* **20**: 91-101.  
771 <http://dx.doi.org/10.1016/j.tplants.2014.09.007>
- 772 **Devoto A, Turner JG** (2005) Jasmonate-regulated *Arabidopsis* stress signalling network. *Physiol*  
773 *Plantarum* **123**: 161-172. [10.1111/j.1399-3054.2004.00418.x](https://doi.org/10.1111/j.1399-3054.2004.00418.x)
- 774 **Dumin W, Rostás M, Winefield C** (2018) Identification and functional characterisation of an allene  
775 oxide synthase from grapevine (*Vitis vinifera* L. Sauvignon blanc). *Mol Biol Rep* **45**: 263-277.  
776 [10.1007/s11033-018-4159-y](https://doi.org/10.1007/s11033-018-4159-y)
- 777 **Eshragui L, Anderson JP, Aryamanesh N, Shearer B, McComb JA, Hardy GESJ, O'Brien PA**  
778 (2011a) Phosphite primed defence responses and enhanced expression of defence genes in  
779 *Arabidopsis thaliana* infected with *Phytophthora cinnamomi*. *Plant Pathol* **60**: 1086-1095.  
780 <https://doi.org/10.1111/j.1365-3059.2011.02471.x>
- 781 **Eshragui L, Aryamanesh N, Anderson JP, Shearer B, McComb JA, Hardy GESJ, O'Brien PA**  
782 (2011b) A quantitative PCR assay for accurate in planta quantification of the necrotrophic  
783 pathogen *Phytophthora cinnamomi*. *Eur J Plant Pathol* **131**: 419-430. [10.1007/s10658-011-9819-](https://doi.org/10.1007/s10658-011-9819-x)  
784 [x](https://doi.org/10.1007/s10658-011-9819-x)
- 785 **Farmer EE, Goossens A** (2019) Jasmonates: what ALLENE OXIDE SYNTHASE does for plants. *J*  
786 *Exptl Bot* **70**: 3373–3378. <https://doi.org/10.1093/jxb/erz254>
- 787 **Froehlich JA, Itoh A, Howe GA** (2001) Tomato Allene Oxide Synthase and fatty acid  
788 hydroperoxide lyase, two Cytochrome P450s involved in oxylipin metabolism, are targeted to  
789 different membranes of chloroplast envelope. *Plant Physiol* **125**: 306-317. [10.1104/pp.125.1.306](https://doi.org/10.1104/pp.125.1.306)
- 790 **Guo, Q, Yoshida Y, Major IT, Wang K, Sugimoto K, Kapali G, Havko NE, Benning C, Howe**  
791 **GA** (2018) JAZ repressors of metabolic defense promote growth and reproductive fitness in  
792 *Arabidopsis*. *Proc Natl Acad Sci USA* **115**: E10768-E10777.  
793 <https://doi.org/10.1073/pnas.1811828115>
- 794 **Herlihy J, Ludwig NR, van den Ackerveken G, McDowell JM** (2019) Oomycetes Used in  
795 *Arabidopsis* Research. *The Arabidopsis Book* **17**: 1-26. <https://doi.org/10.1199/tab.0188>
- 796 **Judelson HS, Ah-Fong AMV** (2019) Exchanges at the Plant-Oomycete interface that influence  
797 disease. *Plant Physiol* **179**: 1198-1211. [www.plantphysiol.org/cgi/doi/10.1104/pp.18.00979](https://doi.org/10.1104/pp.18.00979)
- 798 **Kleinboelting N, Huet G, Kloetgen A, Viehoveer P, Weisshaar B** (2012) GABI-Kat SimpleSearch:  
799 new features of the *Arabidopsis thaliana* T-DNA mutant database. *Nucleic Acids Res* **40**:  
800 D1211-5. [10.1093/nar/gkr1047](https://doi.org/10.1093/nar/gkr1047)
- 801 **Kubigsteltig II, Weiler EW** (2003) *Arabidopsis* mutants affected in the transcriptional control of  
802 allene oxide synthase, the enzyme catalyzing the entrance step in octadecanoid biosynthesis.  
803 *Planta* **217**: 748-757. DOI: [10.1007/s00425-003-1056-x](https://doi.org/10.1007/s00425-003-1056-x)
- 804 **Laudert D, Schaller F, Weiler EW** (2000) Transgenic *Nicotiana tabacum* and *Arabidopsis thaliana*  
805 plants overexpressing allene oxide synthase. *Planta* **211**: 163-165. [10.1007/s004250000316](https://doi.org/10.1007/s004250000316)
- 806 **Laudert D, Weiler EW** (1998) Allene oxide synthase: a major control point in *Arabidopsis thaliana*  
807 octadecanoid signalling. *Plant J* **15**: 675-684. [10.1046/j.1365-3113x.1998.00245.x](https://doi.org/10.1046/j.1365-3113x.1998.00245.x)
- 808 **Marcos R, Izquierdo Y, Vellosillo T, Kulasekaran S, Cascón T, Hamberg M, Castresana C**  
809 (2015) 9-Lipoxygenase-derived oxylipins activate brassinosteroid signaling to promote cell wall-  
810 based defense and limit pathogen infection. *Plant Physiol* **169**: 2324-2334.  
811 [doi/10.1104/pp.15.00992](https://doi.org/10.1104/pp.15.00992)
- 812 **Martinez Trujillo M, Limones-Briones V, Cabrera-Ponce JL, Herrera-Estrella L** (2004)  
813 Improving transformation efficiency of *Arabidopsis thaliana* by modifying the floral dip method.  
814 *Plant Mol Biol Reporter* **22**: 63–70. <https://link.springer.com/article/10.1007/BF02773350>

- 815 **Maurel M, Robin C, Simonneau T, Loustau D, Dreyer E, Desprez-Loustau M-L** (2004) Stomatal  
816 conductance and root-to-shoot signalling in chestnut saplings exposed to *Phytophthora*  
817 *cinnamomi* or partial soil drying. *Functional Plant Biol* **31**: 41 – 51.  
818 <https://doi.org/10.1071/FP03133>
- 819 **Moralejo E, García-Muñoz JA, Descals E** (2009) Susceptibility of Iberian trees to *Phytophthora*  
820 *ramorum* and *P. Cinnamomi*. *Plant Pathol* **58**: 271-283. 10.1111/j.1365-3059.2008.01956.x
- 821 **Pajerowska-Mukhtar KM, Mukhtar MS, Guex N, Halim VA, Rosahl S, Somssich IE, Gebhardt**  
822 **C** (2008) Natural variation of potato allene oxide synthase 2 causes differential levels of  
823 jasmonates and pathogen resistance in *Arabidopsis*. *Planta* **228**: 293-306. 10.1007/s00425-008-  
824 0737-x
- 825 **Park J-H, Halitschke R, Kim HB, Baldwin IT, Feldmann KA, Feyereisen R** (2002) A knock-out  
826 mutation in allene oxide synthase results in male sterility and defective wound signal  
827 transduction in *Arabidopsis* due to a block in jasmonic acid biosynthesis. *Plant J* **31**: 1-12.  
828 <https://doi.org/10.1046/j.1365-313X.2002.01328.x>
- 829 **Peng Q, Zhou Y, Liao Y, Zeng L, Xu X, Jia Y, Dong F, Li J, Tang J, Yang Z** (2018) Functional  
830 characterization of an Allene Oxide Synthase involved in biosynthesis of jasmonic acid and its  
831 influence on metabolite profiles and ethylene formation in tea (*Camellia sinensis*) flowers. *Int J*  
832 *Mol Sci* **19**: 2440. 10.3390/ijms19082440
- 833 **Proietti S, Caarls L, Coolen S, Van Pelt JA, Van Wees SCM, Pieterse CMJ** (2018) Genome-wide  
834 association study reveals novel players in defense hormone crosstalk in *Arabidopsis*. *Plant Cell*  
835 *& Environm* **41**: 2342-2356. <https://doi.org/10.1111/pce.13357>
- 836 **Redondo MA, Pérez-Sierra A, Abad-Campos P, Torres L, Solla A, Reig-Armiñana J, García-**  
837 **Breijo F** (2015) Histology of *Quercus ilex* roots during infection by *Phytophthora cinnamomi*.  
838 *Trees* **29**: 1943-1957. 10.1007/s00468-015-1275-3
- 839 **Robinson LH, Cahill DM** (2003) Ecotypic variation in the response of *Arabidopsis thaliana* to  
840 *Phytophthora cinnamomi*. <https://link.springer.com/article/10.1071/AP02064>
- 841 **Rookes JE, Wright ML, Cahill DM** (2008) Elucidation of defence responses and signalling  
842 pathways induced in *Arabidopsis thaliana* following challenge with *Phytophthora cinnamomi*.  
843 *Physiol Mol Plant Pathol* **72**: 151-161. 10.1016/j.pmpp.2008.08.005
- 844 **Ruano G, Scheuring D** (2020) Plant Cells under Attack: Unconventional Endomembrane Trafficking  
845 during Plant Defense. *Plants* **9**: 389. <https://doi.org/10.3390/plants9030389>
- 846 **Santos C, Duarte S, Tedesco S, Feveireiro P, Costa R** (2017) Expression profiling of *Castanea*  
847 genes during resistant and susceptible interactions with the oomycete pathogen *Phytophthora*  
848 *cinnamomi* reveal possible mechanisms of immunity. *Frontiers Pl Sci* **8**: 515.  
849 [doi.org/10.3389/fpls.2017.00515](https://doi.org/10.3389/fpls.2017.00515)
- 850 **Scholz J, Brodhun F, Hornung E, Herrfurth C, Stumpe M, Beike AK, Faltin B, Frank W, Reski**  
851 **R, Feussner I** (2012) Biosynthesis of allene oxides in *Physcomitrella patens*. *BMC Plant Biol*  
852 **12**: 228. <https://doi.org/10.1186/1471-2229-12-228>
- 853 **Schiller D, Contreras C, Vogt J, Schwab W** (2015) A dual positional specific lipoxygenase  
854 functions in the generation of flavor compounds during climacteric ripening of apple.  
855 *Horticulture Res* **2**: 15003. 10.1038/hortres.2015.3
- 856 **Schlaeppli K, Abou-Mansour E, Buchala A, Mauch F** (2010) Disease resistance of *Arabidopsis* to  
857 *Phytophthora brassicae* is established by the sequential action of indole glucosinolates and  
858 camalexin. *Plant J* **62**: 840-851. 10.1111/j.1365-313X.2010.04197.x
- 859 **Schmittgen TD, Livak KJ** (2008) Analyzing real-time PCR data by the comparative C<sub>T</sub> method.  
860 *Nature protocols* **3**: 1101-1108. 10.1038/nprot.2008.73
- 861 **Serrazina S, Santos C, Machado H, Pesquita C, Vicentini R, Pais MS, Sebastiana M, Costa R**  
862 (2015) *Castanea* root transcriptome in response to *Phytophthora cinnamomi* challenge. *Tree Gen*  
863 *& Genomes* **11**: 6 (2015). <https://doi.org/10.1007/s11295-014-0829-7>
- 864 **Sparkes IA, Runions J, Kearns A, Hawes C** (2006) Rapid, transient expression of fluorescent  
865 fusion proteins in tobacco plants and generation of stably transformed plants. *Nature Protocols* **1**:  
866 2019-2025. 10.1038/nprot.2006.286
- 867 **Sperschneider J, Catanzariti AM, DeBoer K, Petre B, Gardiner DM, Singh KB, Dodds PN,**  
868 **Taylor JM** (2017) LOCALIZER: subcellular localization prediction of both plant and effector  
869 proteins in the plant cell. *Sci Rep* **7**: 44598. 10.1038/srep44598

- 870 **Tijet N, Brash AR.** (2002) Allene oxide synthases and allene oxides. Prostaglandins & Other Lipid  
871 Mediators **68-69**: 423-431. DOI: 10.1016/s0090-6980(02)00046-1
- 872 **Truman W, Bennett MH, Kubigsteltig I, Turnbull C, Grant M** (2007) Arabidopsis systemic  
873 immunity uses conserved defense signaling pathways and is mediated by jasmonates. Proc Natl  
874 Acad Sci USA **16**: 1075-180. <https://doi.org/10.1073/pnas.0605423104>
- 875 **Vellosillo T, Martínez M, López MA, Vicente J, Cascón T, Dolan L, Hamberg M, Castresana C**  
876 (2007) Oxylipins produced by the 9-Lipoxygenase Pathway in Arabidopsis regulate lateral root  
877 development and defense responses through a specific signaling cascade. Plant Cell **19**: 831-846.  
878 DOI: 10.1105/tpc.106.046052
- 879 **Vicente J, Cascón T, Vicedo B, García-Agustín P, Hamberg M, Castresana C** (2012) Role of 9-  
880 lipoxygenase and  $\alpha$ -dioxygenase oxylipin pathways as modulators of local and systemic defense.  
881 Mol Plant **5**: 914-928. doi: 10.1093/mp/ssr105
- 882 **Willetts HJ** (1997) Morphology, development and evolution of stromata/sclerotia and macroconidia  
883 of the Sclerotiniaceae. Mycological Res **101**: 939-952.  
884 <https://doi.org/10.1017/S0953756297003559>
- 885 **von Malek B, van der Graaff E, Schneitz K, Keller B** (2002) The Arabidopsis male-sterile mutant  
886 *dde2-2* is defective in the ALLENE OXIDE SYNTHASE gene encoding one of the key enzymes  
887 of the jasmonic acid biosynthesis pathway. Planta **216**: 187-192. [https://doi.org/10.1007/s00425-](https://doi.org/10.1007/s00425-002-0906-2)  
888 [002-0906-2](https://doi.org/10.1007/s00425-002-0906-2)
- 889 **Yan Y, Stolz S, Chételat A, Reymond P, Pagni M, Dubugnon L, Farmer EE** (2007) A  
890 downstream mediator in the growth repression limb of the jasmonate pathway. Plant Cell **19**:  
891 2470-2483. DOI: 10.1105/tpc.107.050708
- 892

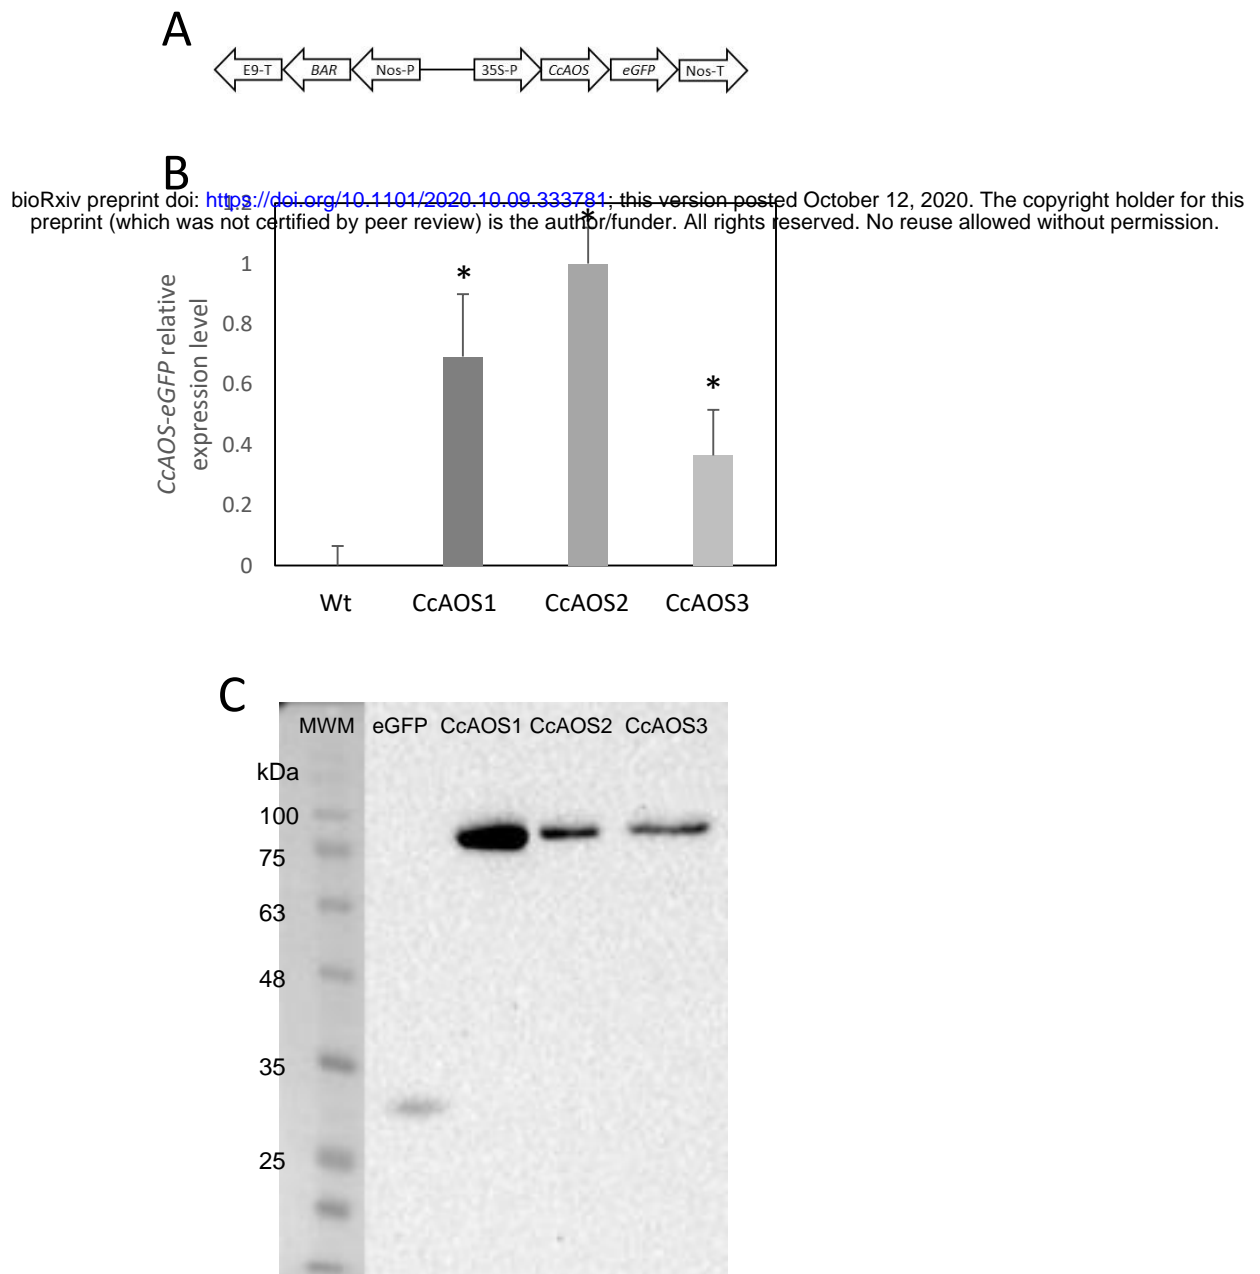

**Figure 1.** Molecular characterization of transgenic Arabidopsis plants expressing *CcAOS*.

A. Schematic diagram of the *CcAOS*-eGFP construct used for transformation. 35S-P: CaMV 35S RNA promoter; *Nos-T*: *Nopaline synthase* terminator; *Nos-P*: *Nopaline synthase* promoter; *BAR*: *Phosphinothricin N-acetyltransferase* coding sequence; *E9-T*: *pea rbcS-E9* terminator.

B. Relative expression levels of *CcAOS*-eGFP in two-week-old transgenic plants. Wild type *Ler-0* was used as negative control. Expression levels were normalized to the *Actin2* (At3g18780) reference gene. The highest level of expression in CcAOS2 was set to 1 and used as calibrator. Error bars represent the standard error of the mean (n=3). Asterisks indicate significant differences in expression between transformed plants ( $P < 0.005$ ; Student's *t*-test).

C. *CcAOS*-eGFP protein expression in two-week-old transgenic plants. An eGFP monoclonal antibody was used in hybridization, and plants transformed with the empty vector were used as positive control for eGFP. Molecular weights: eGFP, 27 KDa; *CcAOS*-eGFP, 77 KDa. Image representative of three independent experiments.

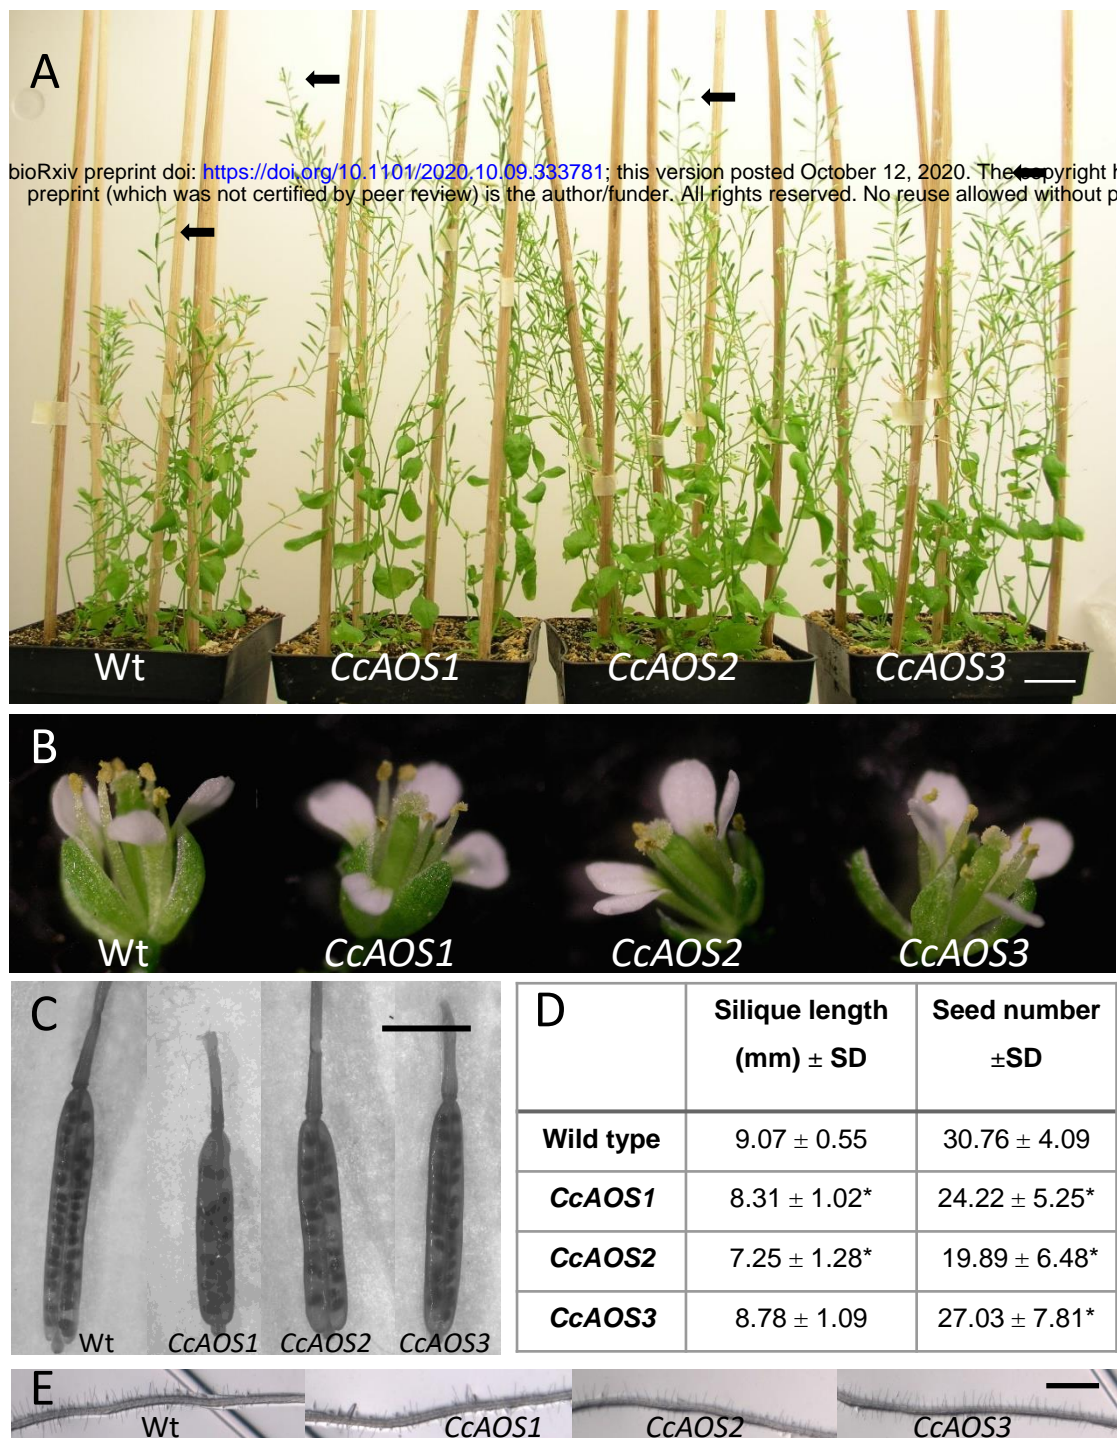

**Figure 2.** Phenotypal characterization of transgenic *Arabidopsis* plants expressing *CcAOS-eGFP*.

A. Two-month-old wild-type (*Ler-0*) and transgenic *CcAOS* plants. Arrowheads indicate the height of flower stalks. Scale bar = 2 cm.

B. Detail of flowers from plants shown in A.

C. Detail of siliques collected from plants shown in A. Bar = 5 mm.

D. Average silique length and seed number ( $\pm$ SD; n=3) collected from plants shown in A. Asterisks indicate significant differences when compared to *Ler-0* plants ( $P < 0.05$ ; Student's *t*-test).

E. Detail of roots from plants shown in A. Scale Bar = 100  $\mu$ m.

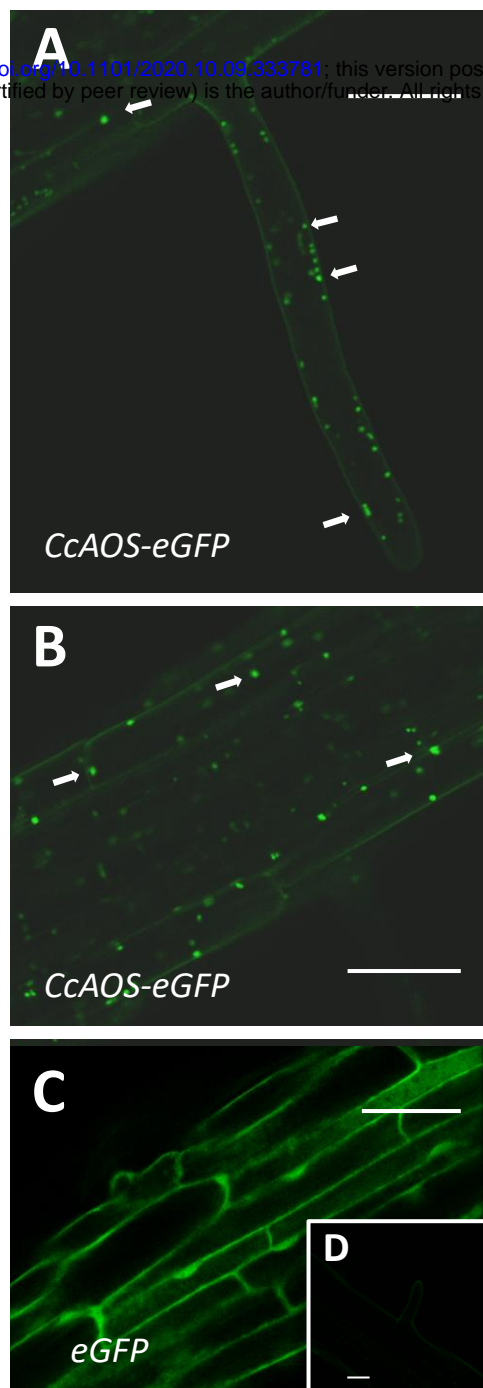

**Figure 3.** Subcellular localization of stable CcAOS-eGFP expression in roots of *A. thaliana*. Scale Bars = 30  $\mu$ m.

A-B. CcAOS-eGFP expression in root hairs (A) and cortical tissue of the primary root (B). Fluorescence accumulates in plastids (arrows).

C. Expression of eGFP alone.

D. Image of non-transformed cortical tissue.

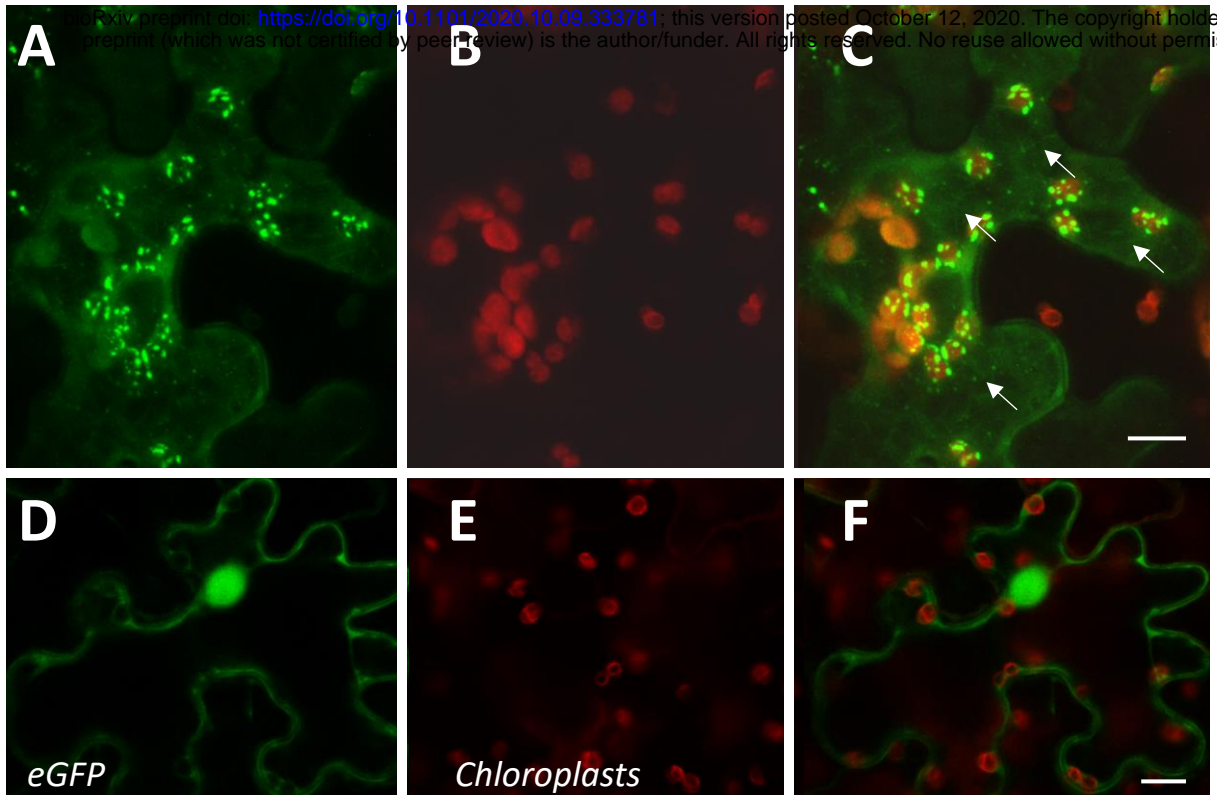

**Figure 4.** Subcellular localization of transient CcAOS-eGFP expression in leaves of *N. benthamiana*. Scale Bars = 10  $\mu$ m.

A-C. CcAOS-eGFP (A), chlorophyll autofluorescence (B) and merged image (C).

D-F. eGFP alone (D), chlorophyll autofluorescence (E) and merged image (F).



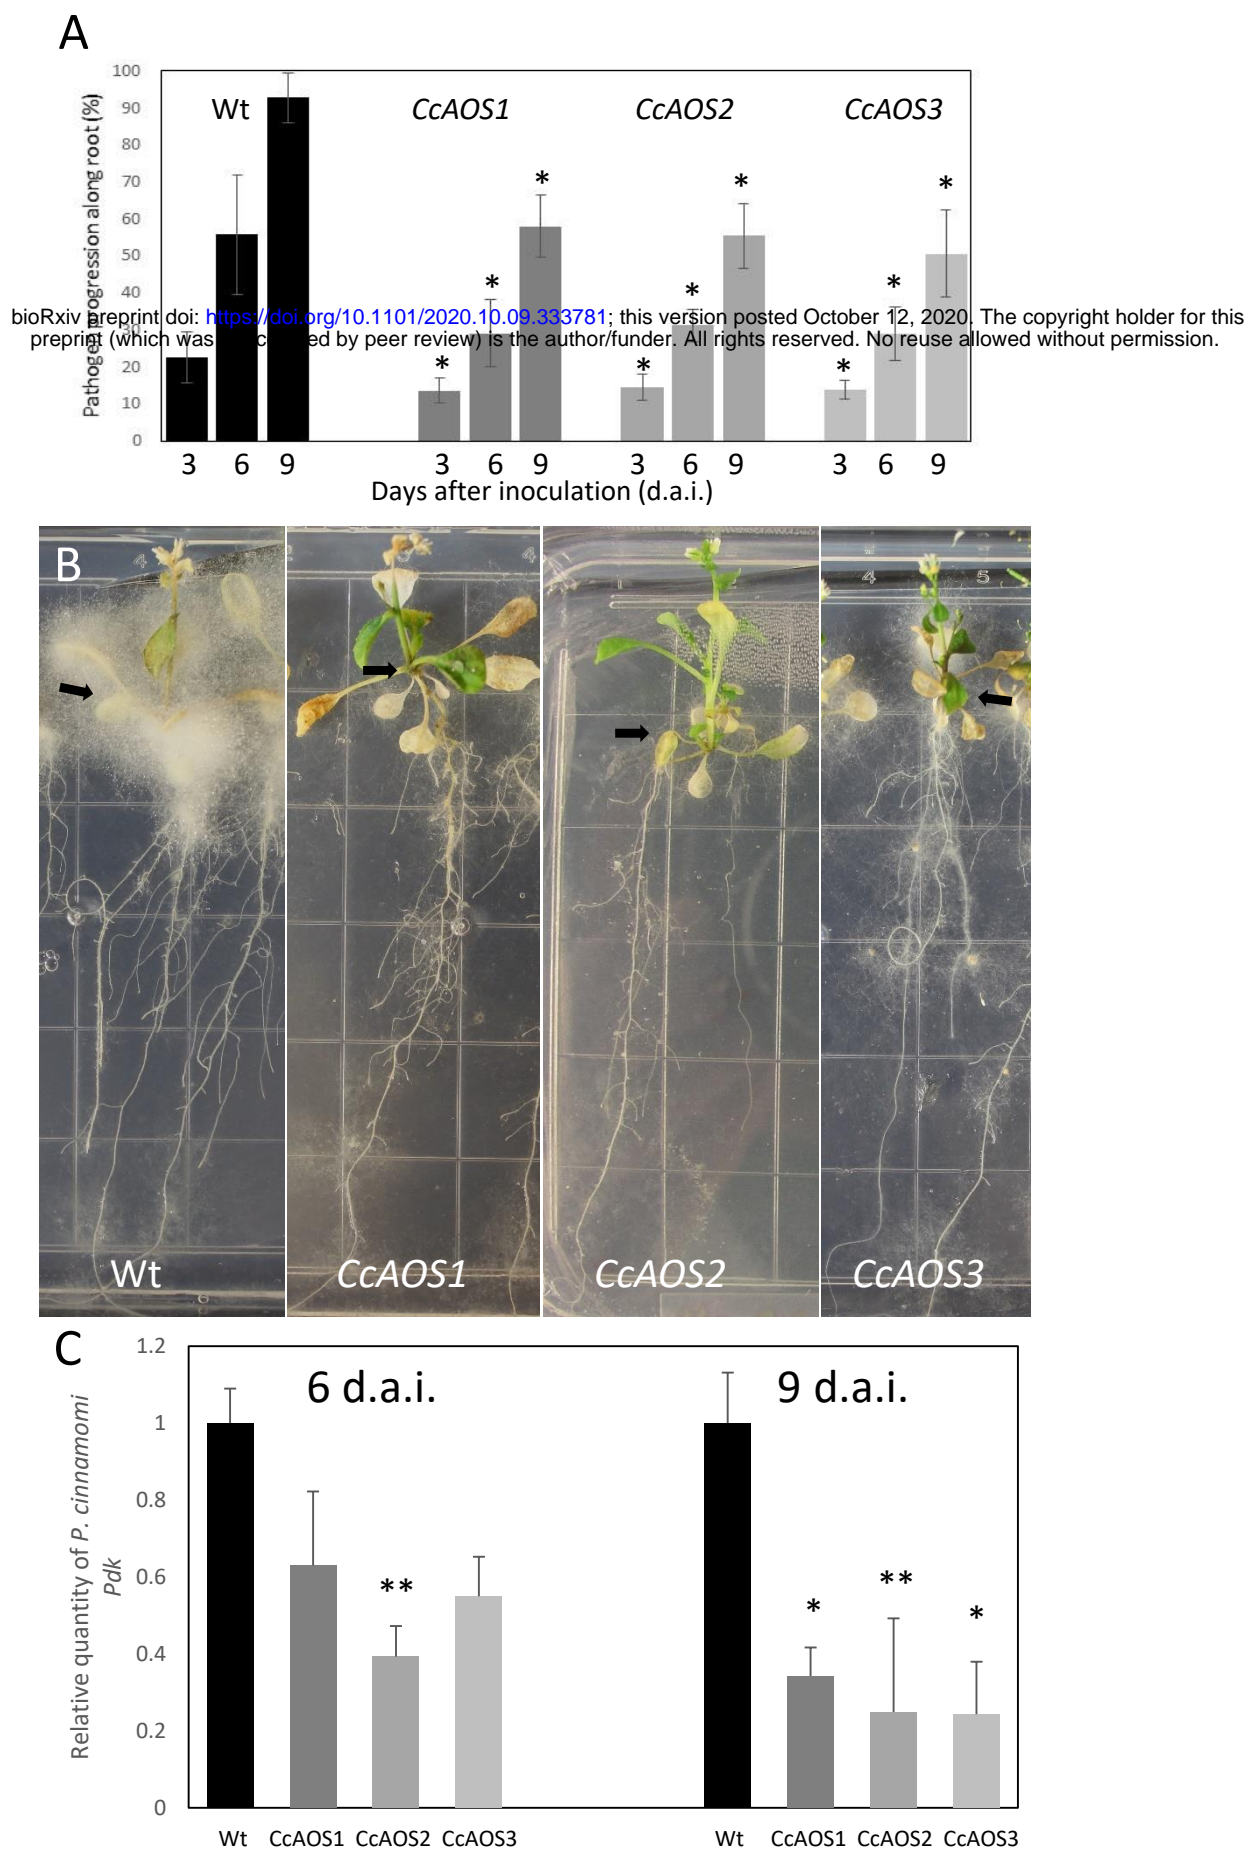

**Figure 5.** *Phytophthora cinnamomi* infection of transgenic *Arabidopsis* plants expressing *CcAOS*.

A. Percentage of *P. cinnamomi* progression along roots of inoculated plants 3, 6 and 9 days after inoculation. Asterisks refer to significant differences from the wild-type *Ler-0* at each time point ( $P < 0.001$ , Student's *t*-test). Error bars represent the standard deviation of the mean ( $n=3$ ).

B. Mycelia accumulation around the plant's aerial part (arrows) 3 weeks after inoculation. Grid squares: 1.4 cm/side.

C. Relative expression of the pathogen *Pdk* gene 6 and 9 days after inoculation (d.a.i.). Values were calculated relative to *Ler-0* wild type inoculated plants and normalized to the reference genes *Mon1* and *RPF3*. Asterisks refer to significant differences from the wild type at each time-point (\* $P < 0.005$ , \*\* $P < 0.05$ ; Student's *t*-test). Error bars represent the standard error of the mean ( $n=3$ ).

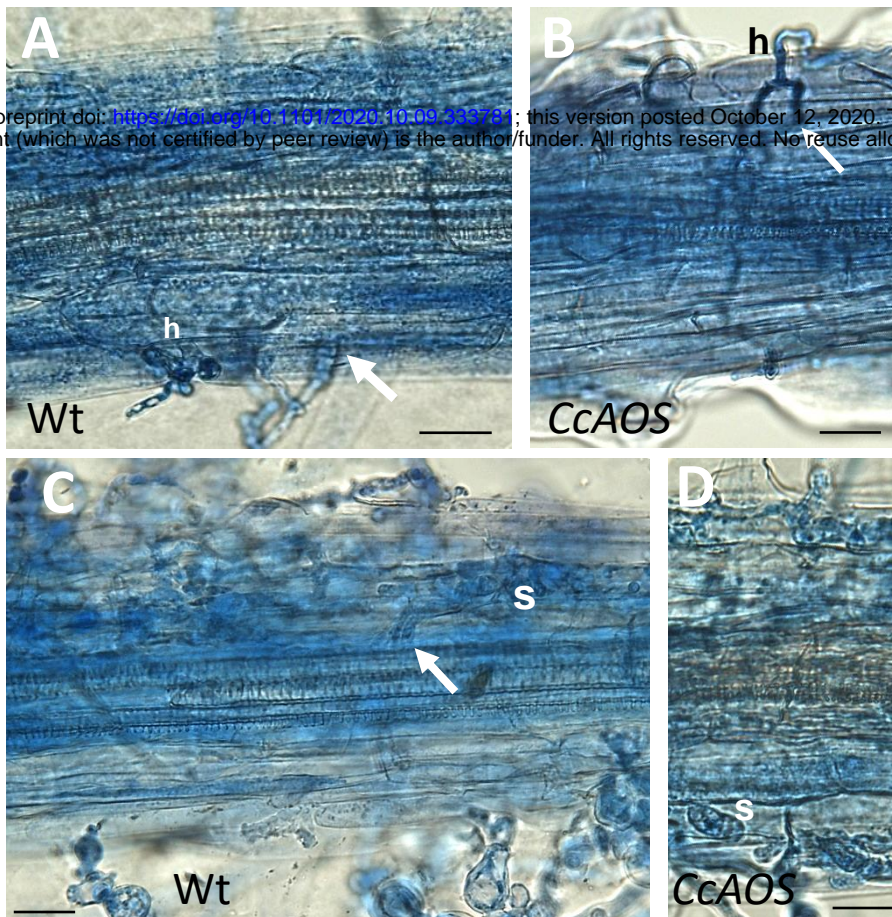

**Figure 6.** Cytological analysis of transgenic *CcAOS* *Arabidopsis* roots inoculated with *P. cinnamomi*. Scale Bars = 30  $\mu\text{m}$ .

A-B. One day after inoculation, mycelia develop haustoria (h) on epidermal cells of *Ler-0* wild type (A) and transgenic *CcAOS* roots (B). Arrows indicate hyphae penetrating the cortex intercellularly.

C-D. Three days after inoculation, stromata (s) develop in cortical cells and hyphae can be observed in the stele (arrow).

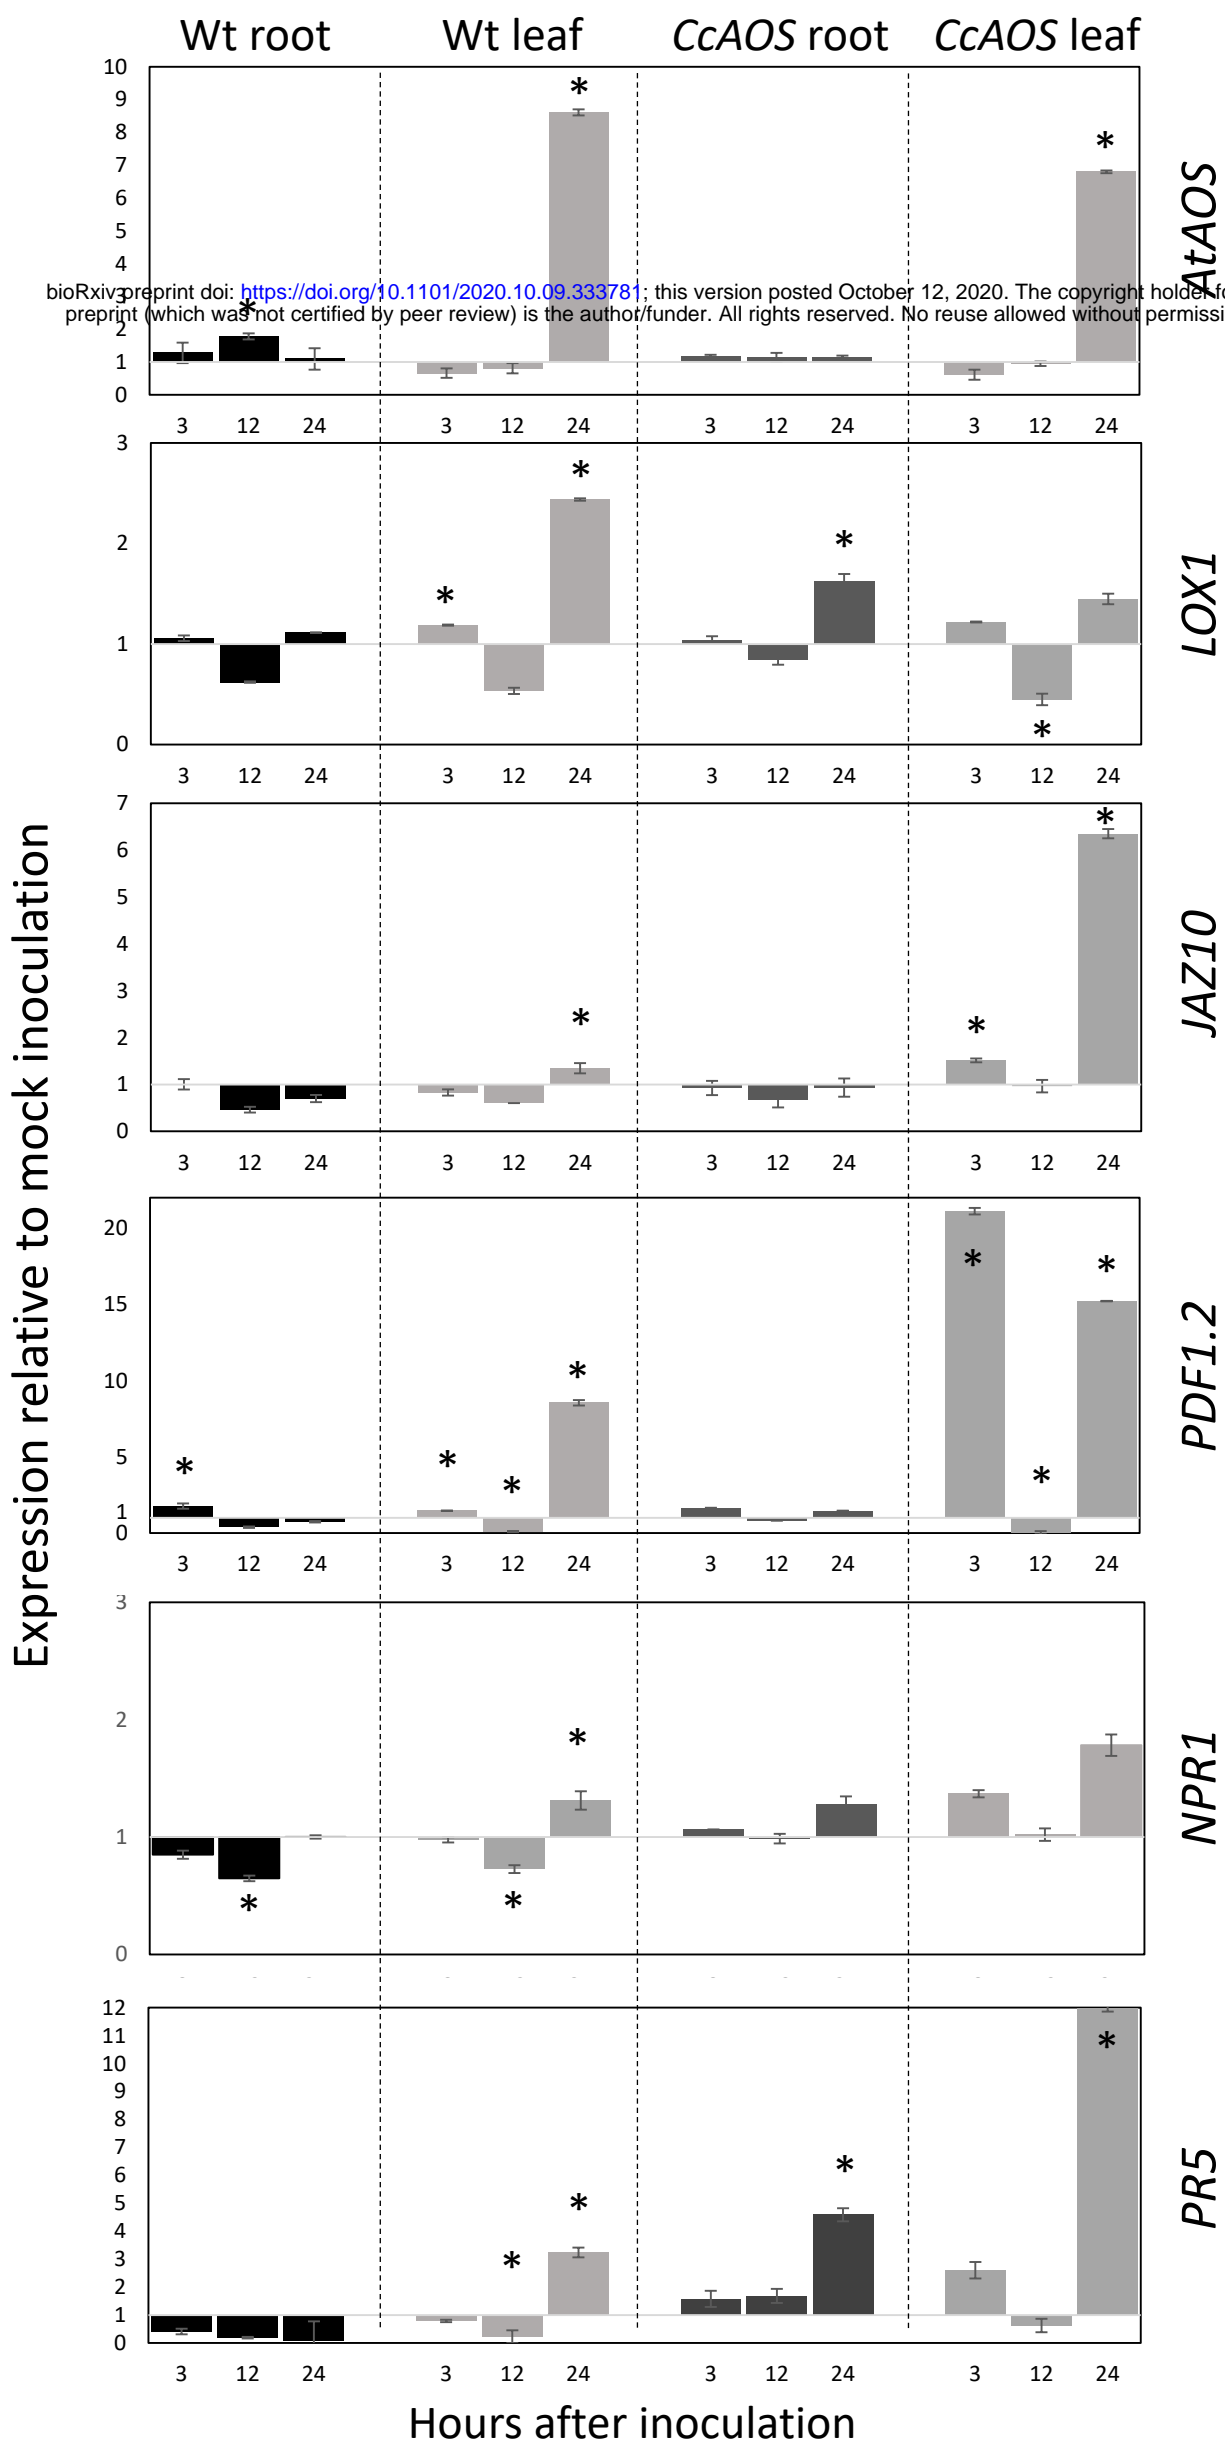

**Figure 7.** Relative expression of JA and SA pathway related genes in two-week-old transgenic *CcAOS* *Arabidopsis* plants at 3, 12 and 24 hours after inoculation (h.a.i.) with *P. cinnamomi*.

bioRxiv preprint doi: <https://doi.org/10.1101/2020.10.09.333781>; this version posted October 12, 2020. The copyright holder for this preprint (which was not certified by peer review) is the author/funder. All rights reserved. No reuse allowed without permission.

Expression of the *LOX1*, *JAZ10*, *PDF1.2*, *NPR1* and *PR5* genes was calculated relative to mock-inoculated plants and normalized to the *Mon1* and *RPF3* reference genes. Error bars represent the standard error of the mean (n=3).

Asterisks indicate significant differences in the expression when compared to mock-inoculation ( $P < 0.05$ , Student's *t*-test).

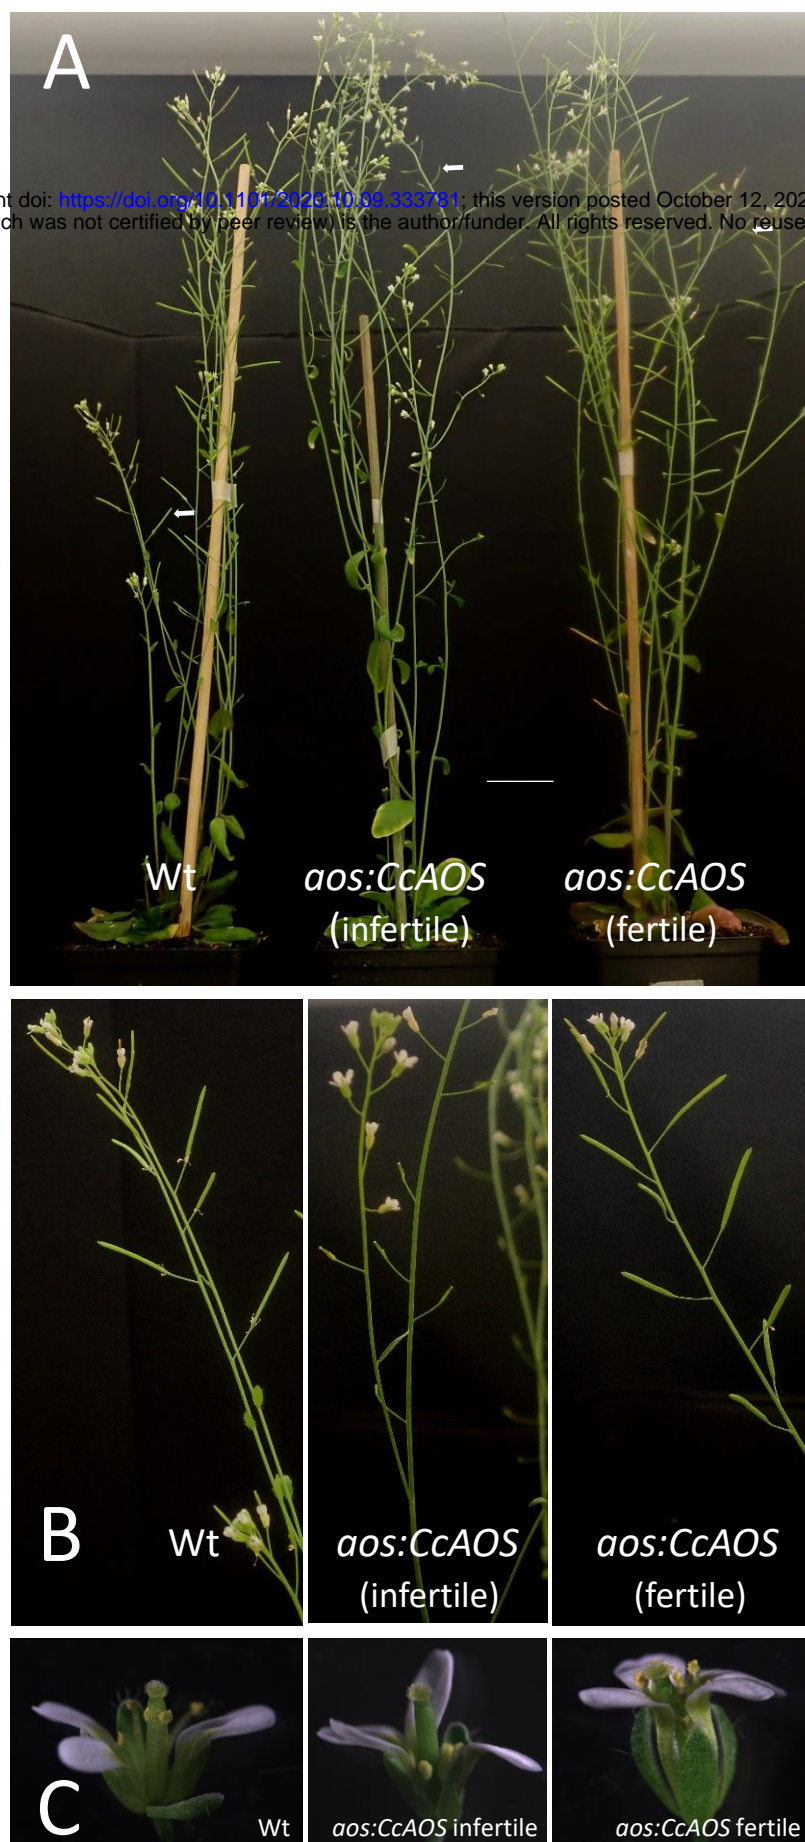

**Figure 8.** Genetic crossing of a *CcAOS* transgenic line with the *Arabidopsis aos-GK624b02* mutant.

A. Two-month-old Col-0 wild-type, *aos:CcAOS* infertile (no inherited *AtAOS*) and *aos:CcAOS* fertile (inherited *AtAOS*) F2 plants. Arrows indicate siliques. Scale bar = 3cm.

B. Detail of flower stalks with siliques.

C. Detail of flowers.

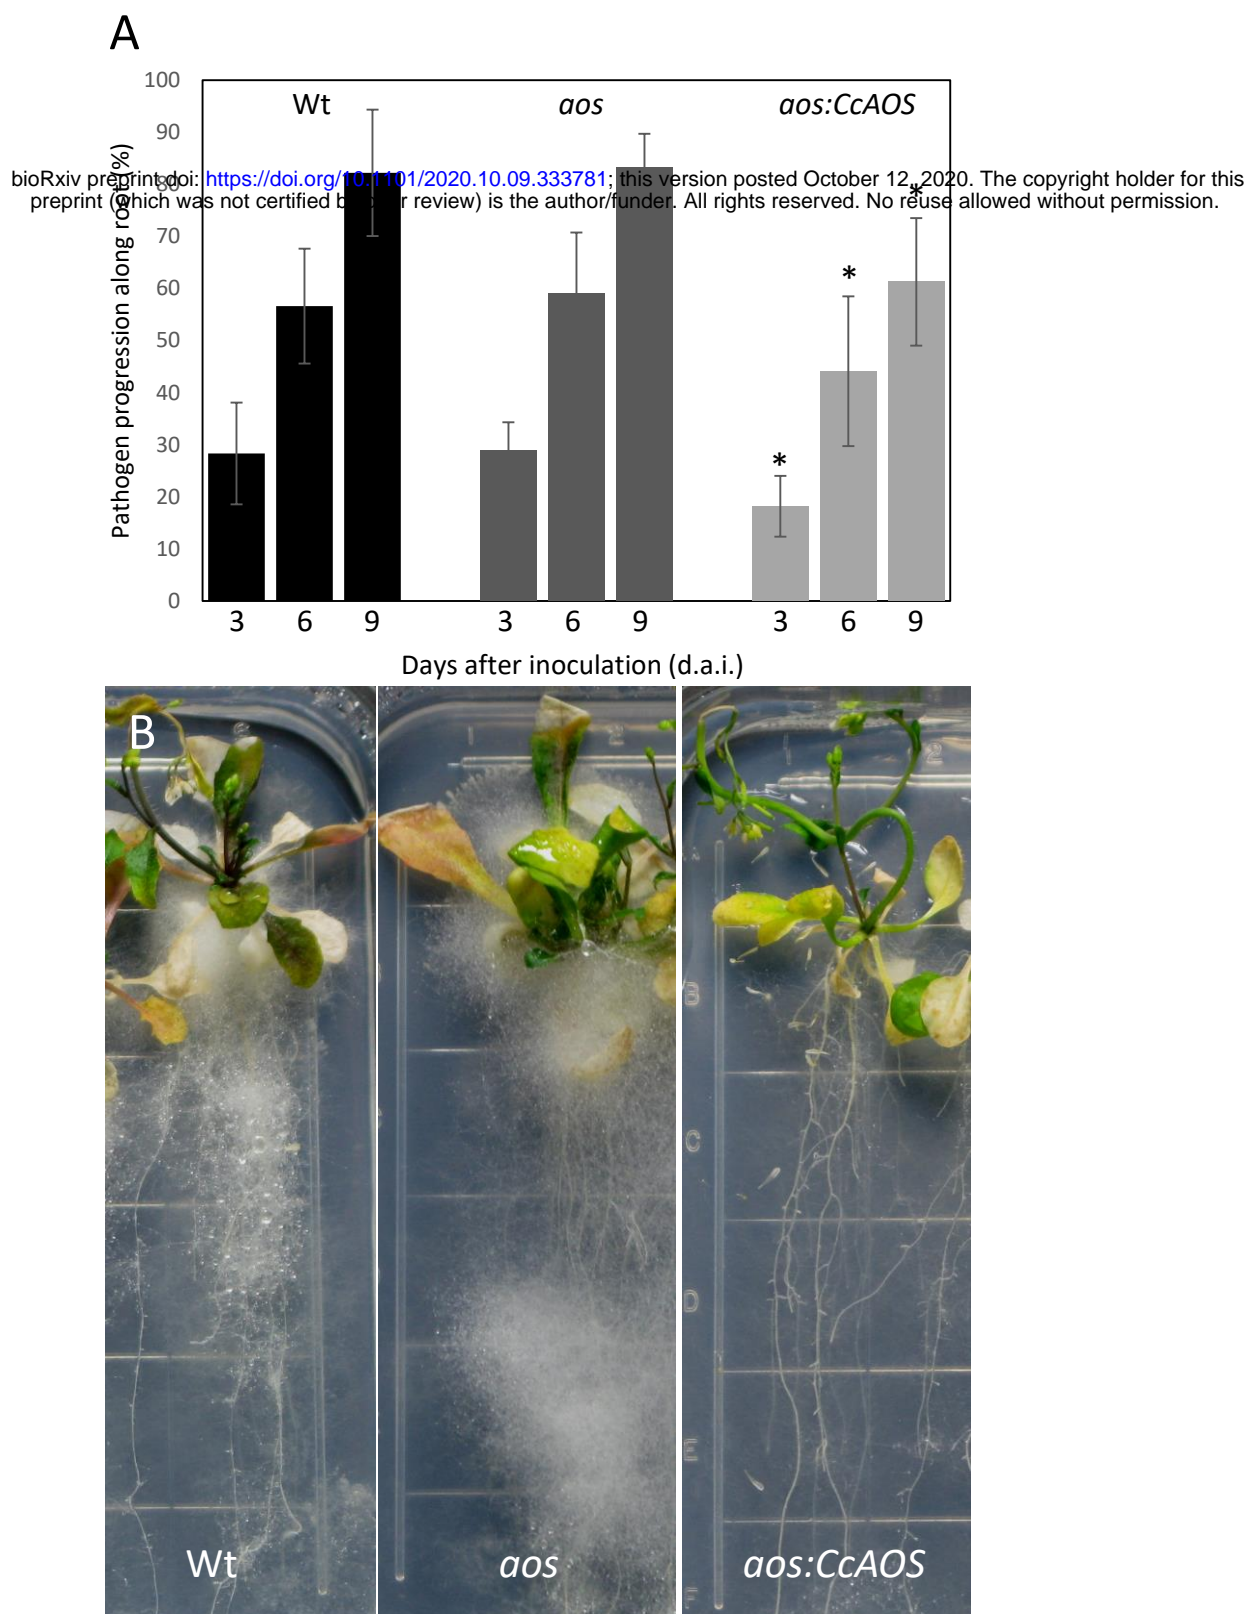

**Figure 9.** *Phytophthora cinnamomi* progression in wild type (Wt), *aos-GK624b02* mutant (*aos*) and *CcAOS*-expressing plants.

A. Percentage of *P. cinnamomi* progression along roots 3, 6 and 9 days after inoculation (d.a.i.). Asterisks refers to significant differences from the Col-0 wild type at each time point ( $P < 0.001$ , Student's *t*-test). Error bars represent the standard deviation of the mean ( $n=3$ ).

B. Mycelia accumulation along roots and around the plant's aerial part, 3 weeks after inoculation. Grid squares: 1.4 cm/side.

## Parsed Citations

Armengaud P, Breitling R, Amtmann A (2004) The potassium-dependent transcriptome of *Arabidopsis* reveals a prominent role of jasmonic acid in nutrient signaling. *Plant Physiol* 136: 2556–2576.

Google Scholar: [Author Only](#) [Title Only](#) [Author and Title](#)

Attard A, Gourgues M, Callemeyn-Torre N, Keller H (2010) The immediate activation of defense responses in *Arabidopsis* roots is not sufficient to prevent *Phytophthora parasitica* infection. *New Phytol* 187: 449–460. 10.1111/j.1469-8137.2010.03272.x

Google Scholar: [Author Only](#) [Title Only](#) [Author and Title](#)

Balfagón D, Sengupta S, Gómez-Cadenas A, Fritschi FB, Azad RK, Mittler R, Zandalinas SI (2019) Jasmonic Acid Is Required for Plant Acclimation to a Combination of High Light and Heat Stress. *Plant Physiology* 181: 1668–1682. 10.1104/pp.19.00956

Google Scholar: [Author Only](#) [Title Only](#) [Author and Title](#)

Bellucci M, De Marchis F, Pompa A (2018) The endoplasmic reticulum is a hub to sort proteins toward unconventional traffic pathways and endosymbiotic organelles. *J Exptl Bot* 69: 7–20. <https://doi.org/10.1093/jxb/erx286>

Google Scholar: [Author Only](#) [Title Only](#) [Author and Title](#)

Camisón Á, Martín MÁ, Sánchez-Bel P, Flors V, Alcaide F, Morcuende D, Glória Pinto G, Solla A (2019) Hormone and secondary metabolite profiling in chestnut during susceptible and resistant interactions with *Phytophthora cinnamomi*. *J Plant Physiol* 241: 153030. <https://doi.org/10.1016/j.jplph.2019.153030>

Google Scholar: [Author Only](#) [Title Only](#) [Author and Title](#)

Chapple C (1998) Molecular-genetic analysis of plant cytochrome P450-dependent monooxygenases. *Ann Rev Plant Physiol Plant Mol Biol* 49: 311–343. <https://doi.org/10.1146/annurev.arplant.49.1.311>

Google Scholar: [Author Only](#) [Title Only](#) [Author and Title](#)

Chen YC, Wong CL, Muzzi F, Vlaardingerbroek I, Kidd BN, Schenk PM (2015) Root defense analysis against *Fusarium oxysporum* reveals new regulators to confer resistance. *Sci Rep* 4: 5584. <https://doi.org/10.1038/srep05584>

Google Scholar: [Author Only](#) [Title Only](#) [Author and Title](#)

Chuberre C, Plancot B, Driouich A, Moore JP, Bardor M, Bruno G, Vicré M (2018) Plant Immunity Is Compartmentalized and Specialized in Roots. *Frontiers PI Sci* 9: 1692. 10.3389/fpls.2018.01692

Google Scholar: [Author Only](#) [Title Only](#) [Author and Title](#)

Clarke JD, Volko SM, Ledford H, Ausubel FM, Dong X (2000) Roles of salicylic acid, jasmonic acid, and ethylene in cpr-induced resistance in *Arabidopsis*. *Plant Cell* 12: 2175–2190. DOI: 10.1105/tpc.12.11.2175

Google Scholar: [Author Only](#) [Title Only](#) [Author and Title](#)

Czechowski T, Stitt M, Altmann T, Udvardi MK, Scheible W-R (2005) Genome-Wide identification and testing of superior reference genes for transcript normalization in *Arabidopsis*. *Plant Physiol* 139: 5–17. <https://doi.org/10.1104/pp.105.063743>

Google Scholar: [Author Only](#) [Title Only](#) [Author and Title](#)

De Coninck B, Timmermans P, Vos C, Cammue BPA, Kazan K (2014) What lies beneath: belowground defense strategies in plants. *Trends PI Sci* 20: 91–101. <http://dx.doi.org/10.1016/j.tplants.2014.09.007>

Google Scholar: [Author Only](#) [Title Only](#) [Author and Title](#)

Devoto A, Turner JG (2005) Jasmonate-regulated *Arabidopsis* stress signalling network. *Physiol Plantarum* 123: 161–172. 10.1111/j.1399-3054.2004.00418.x

Google Scholar: [Author Only](#) [Title Only](#) [Author and Title](#)

Dumin W, Rostás M, Winefield C (2018) Identification and functional characterisation of an allene oxide synthase from grapevine (*Vitis vinifera* L. Sauvignon blanc). *Mol Biol Rep* 45: 263–277. 10.1007/s11033-018-4159-y

Google Scholar: [Author Only](#) [Title Only](#) [Author and Title](#)

Eshragui L, Anderson JP, Aryamanesh N, Shearer B, McComb JA, Hardy GESJ, O'Brien PA (2011a) Phosphite primed defence responses and enhanced expression of defence genes in *Arabidopsis thaliana* infected with *Phytophthora cinnamomi*. *Plant Pathol* 60: 1086–1095. <https://doi.org/10.1111/j.1365-3059.2011.02471.x>

Google Scholar: [Author Only](#) [Title Only](#) [Author and Title](#)

Eshragui L, Aryamanesh N, Anderson JP, Shearer B, McComb JA, Hardy GESJ, O'Brien PA (2011b) A quantitative PCR assay for accurate in planta quantification of the necrotrophic pathogen *Phytophthora cinnamomi*. *Eur J Plant Pathol* 131: 419–430. 10.1007/s10658-011-9819-x

Google Scholar: [Author Only](#) [Title Only](#) [Author and Title](#)

Farmer EE, Goossens A (2019) Jasmonates: what ALLENE OXIDE SYNTHASE does for plants. *J Exptl Bot* 70: 3373–3378. <https://doi.org/10.1093/jxb/erz254>

Google Scholar: [Author Only](#) [Title Only](#) [Author and Title](#)

Froehlich JA, Itoh A, Howe GA (2001) Tomato Allene Oxide Synthase and fatty acid hydroperoxide lyase, two Cytochrome P450s involved in oxylipin metabolism, are targeted to different membranes of chloroplast envelope. *Plant Physiol* 125: 306–317. 10.1104/pp.125.1.306

- Google Scholar: [Author Only](#) [Title Only](#) [Author and Title](#)
- Guo, Q, Yoshida Y, Major IT, Wang K, Sugimoto K, Kapali G, Havko NE, Benning C, Howe GA (2018) JAZ repressors of metabolic defense promote growth and reproductive fitness in Arabidopsis. Proc Natl Acad Sci USA 115: E10768-E10777. <https://doi.org/10.1073/pnas.1811828115>**  
Google Scholar: [Author Only](#) [Title Only](#) [Author and Title](#)
- Herlihy J, Ludwig NR, van den Ackerveken G, McDowell JM (2019) Oomycetes Used in Arabidopsis Research. The Arabidopsis Book 17: 1-26. <https://doi.org/10.1199/tab.0188>**  
Google Scholar: [Author Only](#) [Title Only](#) [Author and Title](#)
- Judelson HS, Ah-Fong AMV (2019) Exchanges at the Plant-Oomycete interface that influence disease. Plant Physiol 179: 1198-1211. [www.plantphysiol.org/cgi/doi/10.1104/pp.18.00979](http://www.plantphysiol.org/cgi/doi/10.1104/pp.18.00979)**  
Google Scholar: [Author Only](#) [Title Only](#) [Author and Title](#)
- Kleinboelting N, Huet G, Kloetgen A, Viehoveer P, Weisshaar B (2012) GABI-Kat SimpleSearch: new features of the Arabidopsis thaliana T-DNA mutant database. Nucleic Acids Res 40: D1211-5. 10.1093/nar/gkr1047**  
Google Scholar: [Author Only](#) [Title Only](#) [Author and Title](#)
- Kubigstellig II, Weiler EW (2003) Arabidopsis mutants affected in the transcriptional control of allene oxide synthase, the enzyme catalyzing the entrance step in octadecanoid biosynthesis. Planta 217: 748-757. DOI: 10.1007/s00425-003-1056-x**  
Google Scholar: [Author Only](#) [Title Only](#) [Author and Title](#)
- Laudert D, Schaller F, Weiler EW (2000) Transgenic Nicotiana tabacum and Arabidopsis thaliana plants overexpressing allene oxide synthase. Planta 211: 163-165. 10.1007/s004250000316**  
Google Scholar: [Author Only](#) [Title Only](#) [Author and Title](#)
- Laudert D, Weiler EW (1998) Allene oxide synthase: a major control point in Arabidopsis thaliana octadecanoid signalling. Plant J 15: 675-684. 10.1046/j.1365-313x.1998.00245.x**  
Google Scholar: [Author Only](#) [Title Only](#) [Author and Title](#)
- Marcos R, Izquierdo Y, Velloso T, Kulasekaran S, Cascón T, Hamberg M, Castresana C (2015) 9-Lipoxygenase-derived oxylipins activate brassinosteroid signaling to promote cell wall-based defense and limit pathogen infection. Plant Physiol 169: 2324-2334. [doi/10.1104/pp.15.00992](https://doi.org/10.1104/pp.15.00992)**  
Google Scholar: [Author Only](#) [Title Only](#) [Author and Title](#)
- Martinez Trujillo M, Limones-Briones V, Cabrera-Ponce JL, Herrera-Estrella L (2004) Improving transformation efficiency of Arabidopsis thaliana by modifying the floral dip method. Plant Mol Biol Reporter 22: 63-70. <https://link.springer.com/article/10.1007/BF02773350>**  
Google Scholar: [Author Only](#) [Title Only](#) [Author and Title](#)
- Maurel M, Robin C, Simonneau T, Loustau D, Dreyer E, Desprez-Loustau M-L (2004) Stomatal conductance and root-to-shoot signalling in chestnut saplings exposed to Phytophthora cinnamomi or partial soil drying. Functional Plant Biol 31: 41 - 51. <https://doi.org/10.1071/FP03133>**  
Google Scholar: [Author Only](#) [Title Only](#) [Author and Title](#)
- Moralejo E, García-Muñoz JA, Descals E (2009) Susceptibility of Iberian trees to Phytophthora ramorum and P. Cinnamomi. Plant Pathol 58: 271-283. 10.1111/j.1365-3059.2008.01956.x**  
Google Scholar: [Author Only](#) [Title Only](#) [Author and Title](#)
- Pajeroska-Mukhtar KM, Mukhtar MS, Guex N, Halim VA, Rosahl S, Somssich IE, Gebhardt C (2008) Natural variation of potato allene oxide synthase 2 causes differential levels of jasmonates and pathogen resistance in Arabidopsis. Planta 228: 293-306. 10.1007/s00425-008-0737-x**  
Google Scholar: [Author Only](#) [Title Only](#) [Author and Title](#)
- Park J-H, Halitschke R, Kim HB, Baldwin IT, Feldmann KA, Feyereisen R (2002) A knock-out mutation in allene oxide synthase results in male sterility and defective wound signal transduction in Arabidopsis due to a block in jasmonic acid biosynthesis. Plant J 31: 1-12. <https://doi.org/10.1046/j.1365-313x.2002.01328.x>**  
Google Scholar: [Author Only](#) [Title Only](#) [Author and Title](#)
- Peng Q, Zhou Y, Liao Y, Zeng L, Xu X, Jia Y, Dong F, Li J, Tang J, Yang Z (2018) Functional characterization of an Allene Oxide Synthase involved in biosynthesis of jasmonic acid and its influence on metabolite profiles and ethylene formation in tea (Camellia sinensis) flowers. Int J Mol Sci 19: 2440. 10.3390/ijms19082440**  
Google Scholar: [Author Only](#) [Title Only](#) [Author and Title](#)
- Proietti S, Carls L, Coolen S, Van Pelt JA, Van Wees SCM, Pieterse CMJ (2018) Genome-wide association study reveals novel players in defense hormone crosstalk in Arabidopsis. Plant Cell & Environm 41: 2342-2356. <https://doi.org/10.1111/pce.13357>**  
Google Scholar: [Author Only](#) [Title Only](#) [Author and Title](#)
- Redondo MA, Pérez-Sierra A, Abad-Campos P, Torres L, Solla A, Reig-Armiñana J, García-Breijo F (2015) Histology of Quercus ilex roots during infection by Phytophthora cinnamomi. Trees 29: 1943-1957. 10.1007/s00468-015-1275-3**  
Google Scholar: [Author Only](#) [Title Only](#) [Author and Title](#)



- Robinson LH, Cahill DM (2003) Ecotypic variation in the response of *Arabidopsis thaliana* to *Phytophthora cinnamomi*. <https://link.springer.com/article/10.1071/AP02064>  
Google Scholar: [Author Only](#) [Title Only](#) [Author and Title](#)
- Rookes JE, Wright ML, Cahill DM (2008) Elucidation of defence responses and signalling pathways induced in *Arabidopsis thaliana* following challenge with *Phytophthora cinnamomi*. *Physiol Mol Plant Pathol* 72: 151-161. 10.1016/j.pmpp.2008.08.005  
Google Scholar: [Author Only](#) [Title Only](#) [Author and Title](#)
- Ruano G, Scheuring D (2020) Plant Cells under Attack: Unconventional Endomembrane Trafficking during Plant Defense. *Plants* 9: 389. <https://doi.org/10.3390/plants9030389>  
Google Scholar: [Author Only](#) [Title Only](#) [Author and Title](#)
- Santos C, Duarte S, Tedesco S, Fevereiro P, Costa R (2017) Expression profiling of *Castanea* genes during resistant and susceptible interactions with the oomycete pathogen *Phytophthora cinnamomi* reveal possible mechanisms of immunity. *Frontiers PI Sci* 8: 515. doi.org/10.3389/fpls.2017.00515  
Google Scholar: [Author Only](#) [Title Only](#) [Author and Title](#)
- Scholz J, Brodhun F, Hornung E, Herrfurth C, Stumpe M, Beike AK, Faltin B, Frank W, Reski R, Feussner I (2012) Biosynthesis of allene oxides in *Physcomitrella patens*. *BMC Plant Biol* 12: 228. <https://doi.org/10.1186/1471-2229-12-228>  
Google Scholar: [Author Only](#) [Title Only](#) [Author and Title](#)
- Schiller D, Contreras C, Vogt J, Schwab W (2015) A dual positional specific lipoxygenase functions in the generation of flavor compounds during climacteric ripening of apple. *Horticulture Res* 2: 15003. 10.1038/hortres.2015.3  
Google Scholar: [Author Only](#) [Title Only](#) [Author and Title](#)
- Schlaeppli K, Abou-Mansour E, Buchala A, Mauch F (2010) Disease resistance of *Arabidopsis* to *Phytophthora brassicae* is established by the sequential action of indole glucosinolates and camalexin. *Plant J* 62: 840-851. 10.1111/j.1365-313X.2010.04197.x  
Google Scholar: [Author Only](#) [Title Only](#) [Author and Title](#)
- Schmittgen TD, Livak KJ (2008) Analyzing real-time PCR data by the comparative CT method. *Nature protocols* 3: 1101-1108. 10.1038/nprot.2008.73  
Google Scholar: [Author Only](#) [Title Only](#) [Author and Title](#)
- Serrazina S, Santos C, Machado H, Pesquita C, Vicentini R, Pais MS, Sebastiana M, Costa R (2015) *Castanea* root transcriptome in response to *Phytophthora cinnamomi* challenge. *Tree Gen & Genomes* 11: 6 (2015). <https://doi.org/10.1007/s11295-014-0829-7>  
Google Scholar: [Author Only](#) [Title Only](#) [Author and Title](#)
- Sparkes IA, Runions J, Kearns A, Hawes C (2006) Rapid, transient expression of fluorescent fusion proteins in tobacco plants and generation of stably transformed plants. *Nature Protocols* 1: 2019-2025. 10.1038/nprot.2006.286  
Google Scholar: [Author Only](#) [Title Only](#) [Author and Title](#)
- Sperschneider J, Catanzariti AM, DeBoer K, Petre B, Gardiner DM, Singh KB, Dodds PN, Taylor JM (2017) LOCALIZER: subcellular localization prediction of both plant and effector proteins in the plant cell. *Sci Rep* 7: 44598. 10.1038/srep44598  
Google Scholar: [Author Only](#) [Title Only](#) [Author and Title](#)
- Tijet N, Brash AR. (2002) Allene oxide synthases and allene oxides. *Prostaglandins & Other Lipid Mediators* 68-69: 423-431. DOI: 10.1016/s0090-6980(02)00046-1  
Google Scholar: [Author Only](#) [Title Only](#) [Author and Title](#)
- Truman W, Bennett MH, Kubigsteltig I, Turnbull C, Grant M (2007) *Arabidopsis* systemic immunity uses conserved defense signaling pathways and is mediated by jasmonates. *Proc Natl Acad Sci USA* 16: 1075-180. <https://doi.org/10.1073/pnas.0605423104>  
Google Scholar: [Author Only](#) [Title Only](#) [Author and Title](#)
- Vellosillo T, Martínez M, López MA, Vicente J, Cascón T, Dolan L, Hamberg M, Castresana C (2007) Oxylipins produced by the 9-Lipoxygenase Pathway in *Arabidopsis* regulate lateral root development and defense responses through a specific signaling cascade. *Plant Cell* 19: 831-846. DOI: 10.1105/tpc.106.046052  
Google Scholar: [Author Only](#) [Title Only](#) [Author and Title](#)
- Vicente J, Cascón T, Vicedo B, García-Agustín P, Hamberg M, Castresana C (2012) Role of 9-lipoxygenase and  $\alpha$ -dioxygenase oxylipin pathways as modulators of local and systemic defense. *Mol Plant* 5: 914-928. doi: 10.1093/mp/ssf105  
Google Scholar: [Author Only](#) [Title Only](#) [Author and Title](#)
- Willets HJ (1997) Morphology, development and evolution of stromata/sclerotia and macroconidia of the Sclerotiniaceae. *Mycological Res* 101: 939-952. <https://doi.org/10.1017/S0953756297003559>  
Google Scholar: [Author Only](#) [Title Only](#) [Author and Title](#)
- von Malek B, van der Graaff E, Schneitz K, Keller B (2002) The *Arabidopsis* male-sterile mutant *dde2-2* is defective in the ALLENE OXIDE SYNTHASE gene encoding one of the key enzymes of the jasmonic acid biosynthesis pathway. *Planta* 216: 187-192. <https://doi.org/10.1007/s00425-002-0906-2>  
Google Scholar: [Author Only](#) [Title Only](#) [Author and Title](#)
- Yan Y, Stolz S, Chételat A, Reymond P, Pagni M, Dubugnon L, Farmer EE (2007) A downstream mediator in the growth repression limb of the jasmonate pathway. *Plant Cell* 19: 2470-2483. DOI: 10.1105/tpc.107.050708
